1 RH: Deep Learning and Phylogeography

2 **Deep learning and likelihood approaches for viral**  
3 **phylogeography converge on the same answers whether**  
4 **the inference model is right or wrong**

5 AMMON THOMPSON<sup>1,\*†</sup>, BENJAMIN LIEBESKIND<sup>2,†</sup>, ERIK J. SCULLY<sup>2,†</sup>, MICHAEL  
6 LANDIS<sup>3,\*</sup>

7 <sup>1</sup>*Participant in an education program sponsored by U.S. Department of Defense (DOD) at the*  
8 *National Geospatial-Intelligence Agency, Springfield, VA, 22150, USA*

9 <sup>2</sup>*National Geospatial-Intelligence Agency, Springfield, VA, 22150, USA*

10 <sup>3</sup>*Department of Biology, Washington University in St. Louis, Rebstock Hall, St. Louis, Missouri,*  
11 *63130, USA*

† The views presented here are those of the authors and do not necessarily represent the views of DoD or its Components.

12 **\*Corresponding authors:** E-mail: Ammon.M.Thompson.ctr@nga.mil and  
13 michael.landis@wustl.edu.

14 *Abstract.* — Analysis of phylogenetic trees has become an essential tool in epidemiology.  
15 Likelihood-based methods fit models to phylogenies to draw inferences about the  
16 phylodynamics and history of viral transmission. However, these methods are  
17 computationally expensive, which limits the complexity and realism of phylodynamic  
18 models and makes them ill-suited for informing policy decisions in real-time during rapidly  
19 developing outbreaks. Likelihood-free methods using deep learning are pushing the  
20 boundaries of inference beyond these constraints. In this paper, we extend, compare and  
21 contrast a recently developed deep learning method for likelihood-free inference from trees.  
22 We trained multiple deep neural networks using phylogenies from simulated outbreaks that  
23 spread among five locations and found they achieve close to the same levels of accuracy as  
24 Bayesian inference under the true simulation model. We compared robustness to model  
25 misspecification of a trained neural network to that of a Bayesian method. We found that  
26 both models had comparable performance, converging on similar biases. We also  
27 implemented a method of uncertainty quantification called conformalized quantile  
28 regression which we demonstrate has similar patterns of sensitivity to model  
29 misspecification as Bayesian highest posterior intervals (HPI) and greatly overlap with  
30 HPIs, but have lower precision (more conservative). Finally, we trained and tested a neural  
31 network against phylogeographic data from a recent study of the SARS-Cov-2 pandemic in  
32 Europe and obtained similar estimates of region-specific epidemiological parameters and  
33 the location of the common ancestor in Europe. Along with being as accurate and robust  
34 as likelihood-based methods, our trained neural networks are on average over 3 orders of  
35 magnitude faster. Our results support the notion that neural networks can be trained with  
36 simulated data to accurately mimic the good and bad statistical properties of the  
37 likelihood functions of generative phylogenetic models.

38 (Keywords: phylogeography, SSE, phylodynamics, machine learning, deep learning,  
39 epidemiology)

## INTRODUCTION

40

41 Viral phylodynamic models use genomes sampled from infected individuals to infer the  
42 evolutionary history of a pathogen and its spread through a population (Holmes and  
43 Garnett 1994; Volz et al. 2013). By linking genetic information to epidemiological data,  
44 such as the location and time of sampling, these generative models can provide valuable  
45 insights into the transmission dynamics of infectious diseases, especially in the early stages  
46 of cryptic disease spread when it is more difficult to detect and track (Holmes et al. 1995;  
47 Rambaut et al. 2008; Lemey et al. 2009; Pybus et al. 2012; Worobey et al. 2016, 2020;  
48 Lemey et al. 2021; Washington et al. 2021; Pekar et al. 2022). This information can be  
49 used to inform public health interventions and improve our understanding of the evolution  
50 and spread of pathogens. Many phylodynamic models are adapted from state-dependent  
51 birth-death (SDBD) processes or, equivalently, state-dependent speciation-extinction (SSE)  
52 models (Maddison et al. 2007; FitzJohn 2012; Kühnert et al. 2014; Beaulieu and O’Meara  
53 2016). These birth-death models correspond to the well-known  
54 Susceptible-Infectious-Recovered (SIR) model during an exponential growth phase, when  
55 nearly all individuals in the population are susceptible to infection (Anderson and May  
56 1979). The simplest SIR models only track the number of susceptible, infected, and  
57 recovered individuals across populations over time, with more advanced models also  
58 allowing the movement of individuals among localized populations. The phylodynamic  
59 models we are interested in track the incomplete transmission tree (phylogeny) of sampled,  
60 infected individuals that emerges from host-to-host pathogen spread among populations  
61 over space and time. Within this broader context, we will refer to the state as location and  
62 the models as location-dependent birth-death (LDBDS) models that include serial  
63 sampling of taxa (Kühnert et al. 2016).

64 Analysts typically fit these birth-death models to data using likelihood-based  
65 inference methods, such as maximum likelihood (Maddison et al. 2007; Richter et al. 2020)  
66 or Bayesian inference (Kühnert et al. 2016; Scire et al. 2020). Likelihood-based inference

67 relies upon a likelihood function to evaluate the relative probability (likelihood) that a  
68 given phylogenetic pattern (i.e., topology, branch lengths, and tip locations) was generated  
69 by a phylodynamic process with particular model parameter values. In this sense the  
70 likelihood of any possible phylodynamic data set is mathematically encoded into the  
71 likelihood as a function of (unknown) data-generating model parameters.

72         Computing the likelihood requires high-dimensional integration over a large and  
73 complex space of evolutionary histories. Analytically integrated likelihood functions,  
74 however, are not known for LDBDS models. Methods developers instead use ordinary  
75 differential equation (ODE) solvers (Maddison et al. 2007; Kühnert et al. 2016) to  
76 numerically approximate the integrated likelihood. These clever approximations perform  
77 well statistically, but are too computationally expensive to use with large epidemic-scale  
78 data sets. Thus, while Nextstrain (Hadfield et al. 2018) and similar efforts have provided  
79 useful visualizations to policy makers during the COVID response, most phylogeographical  
80 methods are used forensically, providing insight on the past, and are not used to provide  
81 parameter estimates in response to emerging events to inform policy decisions in real-time  
82 due to the complexity and long run-times of these models.

83         As phylodynamic models become more biologically realistic, they will necessarily  
84 grow more mathematically complex, and therefore less able to yield likelihood functions  
85 that can be approximated using ODE methods. Because of this, phylodynamic model  
86 developers tend to explore only models for which a likelihood-based inference strategy is  
87 readily available. As a consequence, the lack of scalable inference methods impedes the  
88 design, study, and application of richer phylodynamic models of disease transmission, in  
89 particular, and richer phylogenetic models of lineage diversification, in general.

90         To avoid the computational limitations associated with likelihood-based methods,  
91 deep learning inference methods that are likelihood-free have emerged as a complementary  
92 framework for fitting a wide variety of evolutionary models (Bokma 2006). Deep learning  
93 methods rely on training many-layered neural networks to extract information from data



94 patterns. These neural networks can be trained with simulated data as another way to  
95 approximate the latent likelihood function (Cranmer et al. 2020). Once trained, neural  
96 networks have the benefit of being fast, easy to use, and scalable. Recently, likelihood-free  
97 deep learning neural network methods have successfully been applied to phylogenetics  
98 (da Fonseca et al. 2020; Suvorov et al. 2020; Nesterenko et al. 2022; Solis-Lemus et al.  
99 2022; Suvorov and Schrider 2022) and phylodynamic inference (Lambert et al. 2022;  
100 Voznica et al. 2022).

101 Here we extend new methods of deep learning from phylogenetic trees (Lambert  
102 et al. 2022; Voznica et al. 2022) to explore their potential when applied to phylogeographic  
103 problems in geospatial epidemiology. Phylodynamics of birth-death-sampling processes  
104 that include migration among locations have been under development for more than a  
105 decade (Stadler 2010; Stadler et al. 2012; Kühnert et al. 2014, 2016; Scire et al. 2020; Gao  
106 et al. 2022, 2023). Given the added complexity of location-specific dynamics (e.g.  
107 location-specific infection rates) and recent successes in deep learning with phylogenetic  
108 time trees (Voznica et al. 2022) under state-dependent diversification models (Lambert  
109 et al. 2022), we sought to evaluate this approach when applied to viral phylodynamics and  
110 phylogeography by including location data when training deep neural networks with  
111 phylogenetic trees.

112 A current limitation of likelihood-free approaches is that it remains unknown how  
113 brittle the inference machinery is when the assumptions used for simulation and training  
114 are violated (Schmitt et al. 2022). For example, a brittle deep learning method would be  
115 more easily misled by model misspecification when compared to a likelihood-based method.  
116 Likelihood approaches may have some advantages because the simplifying assumptions are  
117 explicit in the likelihood function while for trained neural networks it is difficult to know  
118 how those same assumptions implemented in the simulation are encoded in data patterns in  
119 the training data and learned network weights. However, with complex likelihood models,  
120 there may be unexpected interactions among simplifying assumptions that can result in

121 large biases when applied to real-world data (Gao et al. 2023). Characterizing the relative  
122 robustness and brittleness of these two inference paradigms is essential for those who wish  
123 to confidently develop and deploy likelihood-free methods of inference from real world data.

124 To explore relative robustness to model misspecification, we trained multiple deep  
125 convolutional neural networks (CNNs) with transmission trees generated from epidemic  
126 simulations. We were able to achieve accuracy very close to that of a likelihood-based  
127 approach and through several model misspecification experiments show that our CNNs are  
128 no more sensitive to model violations than the likelihood approach. Significantly, both  
129 methods consistently show similar biases induced by model violations in test data sets. We  
130 find that for the models tested here, the migration rate estimates are highly sensitive to  
131 misspecification of infection rate and sampling rates, but that estimates of the infection  
132 and sampling rates are fairly robust to misspecification of the migration models. We also  
133 show that the rate parameter estimates are fairly robust to misspecification of both the  
134 number of locations in the model and phylogenetic error. We also estimated prediction  
135 intervals for the rate parameters and compared and contrasted their performance to the  
136 Bayesian highest posterior density intervals (HPI). We show that they produce intervals  
137 that greatly overlap with HPIs in all experiments, but have, on average, wider intervals  
138 making them relatively conservative. Finally, we compared a simulation-trained neural  
139 network to a recent phylodynamic study of the first wave of the COVID pandemic in  
140 Europe (Nadeau et al. 2021) and obtain similar inferences about the dynamics and history  
141 of SARS-CoV-2 in the European clade.

## 142 METHODS

143 First, we define the SIR model we assume here that is approximately equivalent to  
144 the LDBDS model (Kühnert et al. 2016). Following that, is a description of the simulation  
145 method to generate the training, validation, and test data sets of phylogenies under the  
146 model. The simulation and data processing pipeline is shown in Figure 1. We next describe

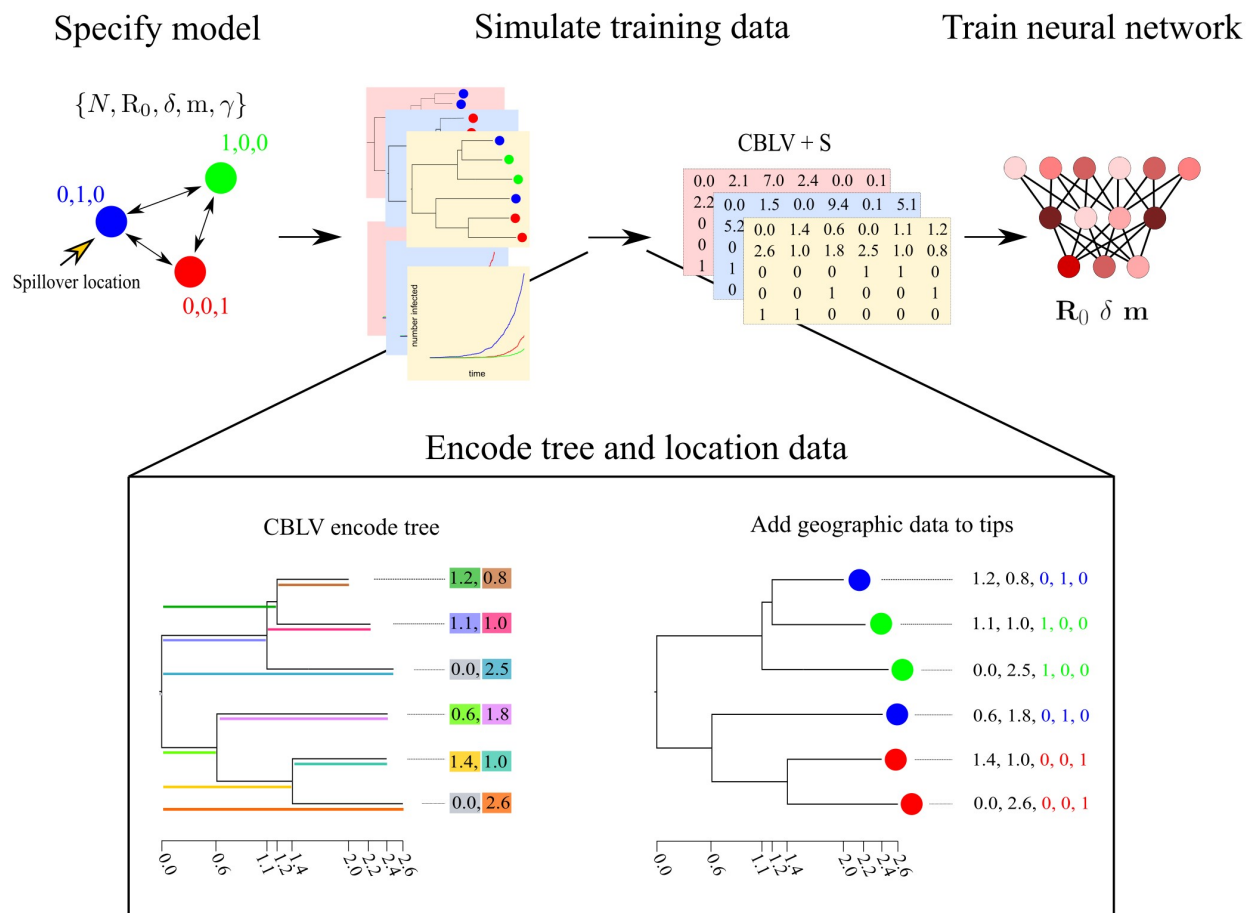

Figure 1: Simulation and tree encoding pipeline for generating training data. 1) Specify a model, for example an SIR model with serial sampling and migration among three locations (colored circles). 2) Run simulations of outbreaks under the model to generate population trajectories and phylogenetic trees. 3) Encode trees and location data into the Compact Bijetive Ladderized Vector + States (CBLV+S) format. 4) Train the neural network with CBLV+S training data.

147 our implementation of simulation-trained deep learning inference with convolutional neural  
148 networks (CNN) as well as a likelihood-based method using Bayesian inference. We then  
149 describe our methods for measuring and comparing their performance when tested against  
150 data sets generated by simulations under the inference model as well as several data sets  
151 simulated under models that violate assumptions of the inference model. Finally, we  
152 describe how we tested our simulation-trained CNN against a real-world data set.

153

### *Model definition*

154 We first define a general location-dependent SIR stochastic process used for simulations  
155 and likelihood function derivation in the format of reaction equations we specified in  
156 MASTER (Vaughan and Drummond 2013). Reaction equations 1 through 4 specify the  
157 SIR compartment model with migration and serial sampling where  $S$ ,  $I$ , and  $R$  denote the  
158 number of individuals in each compartment. The  $S$  and  $I$  compartments are indexed by  
159 geographic location using  $i$  and  $j$ .  $N_i$  is the total population size in location  $i$  and  
160  $N_i = S_i + I_i + R_i$ . To simplify notation, we consider all local recoveries to lead to the same  
161 global compartment and absorbing state,  $R$ . The symbols for each rate parameter is placed  
162 above each reaction arrow.

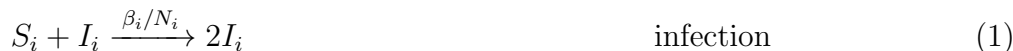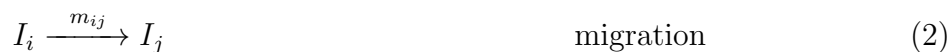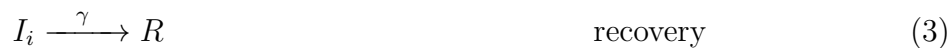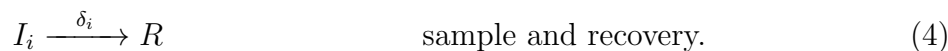

163 We parameterize the model with the basic reproduction number in location  $i$ ,  $R_{0_i}$ ,  
164 which is related to  $\beta_i$  and  $\delta_i$  by equation 5,

$$R_{0_i} = \frac{\beta_i}{\gamma + \delta_i}. \quad (5)$$

165 In particular, our study considers a location-independent SIR (LISIR) model with  
166 sampling that assumes  $R_{0_i}$  was equal among all locations, and a location-dependent  
167 (LDSIR) model with sampling that assumes  $R_{0_i}$  varied among locations. During the  
168 exponential growth phase of an outbreak, the LISIR and LDSIR models are equivalent to  
169 the location-independent birth-death-sampling (LIBDS) and location-dependent  
170 birth-death-sampling (LDBDS) models, respectively, that are often used in viral  
171 phylogeography (Kühnert et al. 2014, 2016; Douglas et al. 2021).

172 Each infectious individual transitions to recovered at rate  $\gamma$ . We assumed that  
173 sampling a virus in an individual occurs at rate  $\delta_i$  in location  $i$  and immediately removes  
174 that individual from the infectious compartment and places them in the recovered  
175 compartment. Thus the effective recovery rate in location  $i$  is  $\gamma + \delta_i$ . The above reactions  
176 correspond to the following coupled ordinary differential equations.

$$\begin{aligned} \frac{dS_i}{dt} &= -\frac{\beta_i}{N_i} S_i I_i \\ \frac{dI_i}{dt} &= \frac{\beta_i}{N_i} S_i I_i + \sum_{j \neq i}^n m_{ij} I_j - \sum_{j \neq i}^n m_{ji} I_i - (\gamma + \delta_i) I_i \\ \frac{dR}{dt} &= \sum_{i=1}^n (\gamma + \delta_i) I_i \end{aligned} \quad (6)$$

177 When the migration rate is constant among locations and the model is a  
178 location-independent SIR model, or equivalently, LIBDS, and we set  $S_i(t = 0) \approx N_i$  at the  
179 beginning of the outbreak, the equation set 6 reduces to

$$\begin{aligned}\frac{dS_i}{dt} &= -\beta I_i \\ \frac{dI_i}{dt} &= \beta I_i + m \left( \sum_{j \neq i}^n I_j - (n-1)I_i \right) - (\gamma + \delta)I_i \\ \frac{dR}{dt} &= (\gamma + \delta) \sum_{i=1}^n I_i\end{aligned}$$

180

181 The number of infections and the migration of susceptible individuals is at  
182 negligible levels on the timescales investigated here. The infection rate is, therefore,  
183 approximately constant and the migration of susceptible individuals can be safely ignored  
184 requiring only migration of infectious individuals to be simulated.

185 At the beginning of an outbreak, it is often easier to know the recovery period from  
186 clinical data than the sampling rate which requires knowing the prevalence of the disease.  
187 Therefore, we treat the average recovery period as a known quantity and use it to make the  
188 other two parameters (the sampling rate and the basic reproduction number  $R_0$ )  
189 identifiable. This was done by fixing the corresponding rate parameter in the likelihood  
190 function to the true simulated value for each tree, and by adding the true simulated value  
191 to the training data for training the neural network.

192

### *Simulated training and validation data sets*

193 Epidemic simulations of the SIR+migration model that approximates the LIBDS process  
194 were performed using the MASTER package v. 6.1.2 (Vaughan et al. 2014) in BEAST 2 v.  
195 2.6.6 (Bouckaert et al. 2019). MASTER allows users to simulate phylodynamic data sets  
196 under user-specified epidemiological scenarios, for which MASTER simultaneously  
197 simulates the evolution of compartment (population type) sizes and tracks the branching  
198 lineages (transmission trees in the case of viruses) from which it samples over time. We

199 trained neural networks with these simulated data to learn about latent populations from  
200 the shape of sampled and subsampled phylogenies. In addition to the serial sampling  
201 process, at the end of the simulation 1% of infected lineages were sampled. In MASTER  
202 this was approximated by setting a very high sampling rate and very short sampling time  
203 such that the expected number sampled was approximately 1%. This final sampling event  
204 was required to make a 1-to-1 comparison of the likelihood function used for this study (see  
205 Likelihood method description below) which assumes at least one extant individual was  
206 sampled to end the process. Coverage statistics from our MCMC samples closely match  
207 expectations (see Likelihood method description below; SI Figure 2 C). Simulation  
208 parameters under LIBDS and LDBDS models for training the neural network under the  
209 phylogeography model were drawn from the following distributions:

$$\begin{aligned}R_0 &\sim \text{Uniform}(2, 8) \\ \delta &\sim \text{Uniform}(0.0001, 0.005) \\ m &\sim \text{Uniform}(0.0001, 0.005) \\ \gamma &\sim \text{Uniform}(0.01, 0.05)\end{aligned}\tag{7}$$

spillover location  $\sim$  Multinomial( $k = 1$ ,  $p_i = 1/5$ ), for 5 locations

210 All five locations had initial population sizes of 1,000,000 susceptible individuals and  
211 one infected individual in a randomly sampled spillover location. Simulations were run for  
212 100 time units or until 50,000 individuals had been infected to restrict simulations to the  
213 approximate exponential phase of the outbreak. For the experiments comparing the CNN  
214 to the likelihood-based method under the LIBDS model, if this population threshold was  
215 reached the simulation was rejected. This criterion was not enforced for simulations under  
216 the LDBDS model. This ensured the LIBDS model used in the likelihood-based analyses  
217 are equivalent to more complex density-dependent SIR models. After simulation, trees with

218 500 or more tips were uniformly and randomly downsampled to 499 tips and the sampling  
219 proportion was recorded for training the neural networks and to adjust estimates of  $\delta$ .

220 We simulated 410,000 outbreaks under these LIBDS settings to generate the  
221 training, validation, and test sets for deep learning. Any simulation that generated a tree  
222 with less than 20 tips was discarded, leaving a total of 111,157 simulated epidemiological  
223 data sets. Of these, 104,157 data sets were used to train and 7,000 were used to validate  
224 and test each CNN. A total of 193,110 LDBDS data sets were simulated, with 186,110 used  
225 to train and 7,000 used to validate and test the LDBDS CNNs.

226 To make phylodynamic inferences about the first wave of the SARS-CoV-2 epidemic  
227 in Europe we used the LDBDS model on the data set from Nadeau et al. (2021). Training  
228 simulation parameters for the LDBDS process were drawn from the same distributions as  
229 LIBDS except  $R_0$  which was unique for each location. We assume that the variability of  $R_0$   
230 among different pathogens (simulated outbreaks) is greater than the variability of the same  
231 pathogen's  $R_0$  among different locations within the same simulation. To implement this  
232 assumption, all  $R_0$  was drawn from a joint distribution to narrow the magnitude of  
233 differences among locations within simulations to be within 6 of each other but expand the  
234 magnitude of differences between simulations to range from 0.9 to 15:

$$\alpha \sim \text{Uniform}(3.9, 12)$$

$$R_{0_i} | \alpha \sim \text{Uniform}(\alpha - 3, \alpha + 3)$$

235 For the empirical analysis, population sizes at each location were also set to 500,000  
236 and instead of running the simulations for 100 time units, time was scaled by the recovery  
237 period,  $1/\gamma$ , and was drawn from a uniform distribution:



time  $\sim$  Uniform(1, 20)

238 *Simulated test data sets with and without model misspecification*

239 All simulation models used for training and testing are listed in Table 1. We first  
240 simulated a test set of 138 trees under the training model to compare the accuracy of the  
241 CNN and the likelihood-based estimates when the true model is specified. These data sets  
242 were simulated by random draws of parameter values from the same distributions described  
243 above for generating the training data set.

244 Sensitivity to model misspecification for each of the three rate parameters,  $R_0$ ,  $\delta$ ,  
245 and  $m$ , was tested. All sensitivity experiments used the same LIBDS model for inference  
246 for both the CNN and the Likelihood-based methods. Sensitivity experiments were  
247 conducted by simulating a test data set of trees that were generated by an epidemic  
248 process that was more complex than or different from the LIBDS model.

249 The tree data set for the misspecified  $R_0$  experiment consisted of simulating  
250 outbreaks where each location had a unique  $R_0$  drawn from the same distribution as above.  
251 Likewise, the misspecified sampling model test set was generated by simulating outbreaks  
252 where each location had a unique sampling rate,  $\delta$ , drawn from the same distribution used  
253 for the global sampling rate described above. For the misspecified migration model, a  
254 random pair of coordinates, each drawn from a uniform(0,5) distribution in a plane, were  
255 generated for the five locations, and a pairwise migration rate was computed such that  
256 pairwise migration rates were symmetric and proportional to the inverse of their euclidean  
257 distances and the average pairwise migration rate was equal to a random scalar which was  
258 also drawn from a uniform distribution (see equations 7 above).

259 The tree set for the misspecified number of locations experiment was generated by

| Description                          | Simulation model parameters and data                                            |
|--------------------------------------|---------------------------------------------------------------------------------|
| Generate training data               | $\{N, R_0, \delta, m, \gamma, \Psi\}$                                           |
| Misspecify $R_0$                     | $\{N, R_{0_1}, R_{0_2}, R_{0_3}, R_{0_4}, R_{0_5}, \delta, m, \gamma, \Psi\}$   |
| Misspecify $\delta$                  | $\{N, R_0, \delta_1, \delta_2, \delta_3, \delta_4, \delta_5, m, \gamma, \Psi\}$ |
| Misspecify $m$                       | $\{N, R_0, \delta, m_{ij} \forall i \neq j \in \{1, \dots, N\}, \gamma, \Psi\}$ |
| Misspecify number of locations       | $\{2N, R_0, \delta, m, \gamma, \Psi\}$                                          |
| Tree error                           | $\{N, R_0, \delta, m, \gamma, \Psi^{\text{error}}\}$                            |
| Analyze Nadeau et al. (2021) dataset | $\{N, R_{0_1}, R_{0_2}, R_{0_3}, R_{0_4}, R_{0_5}, \delta, m, \gamma, \Psi\}$   |

Table 1: Models used in this study. All simulations assume an SIR compartmental epidemic model.  $N = 5$  is the number of locations,  $R_0$  is the basic reproduction number,  $\delta$  is the sampling rate,  $m$  is the migration rate,  $\gamma$  is the recovery rate (treated as data), and  $\Psi$  is the phylogenetic tree + locations (also treated as data).

260 simulating outbreaks among ten locations instead of five. After simulations, six locations  
 261 were chosen at random and re-coded as being sampled from the same location.

262 To generate a test set where the time tree used for inference has incorrect topology  
 263 and branch lengths, we implemented a basic pipeline of tree inference from simulated  
 264 genetic data to mimic a worst case real world scenario. We simulated trees under the same  
 265 settings as before. Phylogenetic error was introduced in two ways: the amount of site data  
 266 (short sequences) and misspecification of the DNA sequence evolution inference model  
 267 using seq-gen V. 1.3.2 (Rambaut and Grassly 1997). We simulated the evolution of a 200  
 268 base-pair sequence under an HKY model with  $\kappa = 2$ , equal base frequencies and 4  
 269 discretized-gamma(2, 2) rate categories for among site rate variation. The simulated  
 270 alignment as well as the true tip dates (sampling times) was then used to infer test trees.  
 271 Test tree inference was done using IQ-Tree v. 2.0.6 (Minh et al. 2020) assuming a  
 272 Jukes-Cantor model of evolution where all transition rates are equal. The inference model  
 273 also assumed no among-site rate variation. The number of shared branches between the  
 274 true transmission tree and the test tree inferred by IQ-Tree was measured using gotree v.  
 275 0.4.2 (Lemoine and Gascuel 2021). Polytomies were resolved using phytools (Revell 2012)  
 276 and a small, random number was added to each resolved branch. These trees were then  
 277 used for likelihood inference and CNN prediction.

278

## *Deep learning inference method*

279 The resulting trees and location metadata generated by our pipeline were converted to a  
280 modified CBLV format (Voznica et al. 2022), which we refer to as the CBLV+S (+State of  
281 character, *e.g.* location) format (Figure 1). The CBLV format uses an in-order tree  
282 traversal to translate the topology and branch lengths of the tree into an  $2 \times n$  matrix  
283 where  $n$  is the maximum number of tips allowed for trees. The matrix is initialized with  
284 zeroes. We then fill the matrix starting with the root then proceed to the tip with largest  
285 root-to-tip distance rather than starting with that tip as in Voznica et al. (2022). We chose  
286 this to separate the the zero value of the root age from the zeroes used to pad matrices  
287 where the tree has less than the maximum number of tips, though we expect this to make  
288 marginal to no difference in performance. The CBLV representation gives each sampled tip  
289 a pair of coordinates in ‘tree-traversal space’. Our CBLV+S format associates geographic  
290 information corresponding with each sampled taxon by appending each vector column with  
291 a one-hot encoding vector of length  $g$  states to yield a  $(2 + g) \times n$  CBLV+S matrix. The  
292 CBLV+S format allows for multiple characters and/or states to be encoded, extending the  
293 single binary character encoding format introduced by Lambert et al. (2022). Our study  
294 uses CBLV+S to encode a single character with  $g = 5$  location-states. In addition to the  
295 the CBLV+S data, we also include a few tree summary statistics and known simulating  
296 parameters; the number of tips, mean branch length, the tree height and the recovery rate  
297 and the subsampling proportion. Trees were rescaled such that their mean branch length  
298 was the default for phylodeep (Voznica et al. 2022) before training and testing of the CNN.  
299 The mean pre-scaling branch length and tree heights were also fed into the neural networks.  
300 Trees were not rescaled for the likelihood-based analysis. Recall that tree height did not  
301 vary for the LIBDS CNN training set but did for the LDBDS training set (see simulation  
302 time settings above). Varying the time-scale for the LDBDS model was necessary for  
303 analyzing real world data where time-scales of outbreaks can vary considerably.

304

Our CNNs were implemented in Python 3.8.10 using keras v. 2.6.0 and

305 tensorflow-gpu v. 2.6.0. (Chollet; Abadi et al. 2016). CNNs consist of one or more layers  
306 specifically intended for structural feature extraction. CNNs utilize a filter, akin to a  
307 sliding window, that executes a mathematical operation (convolution) on the input data.  
308 When dealing with structured data like the CBLV+S matrix, multiple 1D filters slide  
309 across the matrix's columns, embedding each scanned window into an N-dimensional vector  
310 representation. This architectural design imparts CNNs with translation invariance,  
311 enabling them to recognize and learn repeating patterns throughout the input space,  
312 regardless of their specific location. Stacking multiple convolutional layers enables CNNs to  
313 decipher hierarchical structures within the data. See Alzubaidi et al. (2021) and Khan  
314 et al. (2020) for reviews of the subject.

315         For each model, LIBDS and LDBDS, we designed and trained two CNN  
316 architectures, one to predict epidemiological rate parameters and the other to predict the  
317 outbreak location resulting in four total CNNs trained by two training data sets (LIBDS  
318 and LDBDS). We used the mean-squared-error for the regression neural loss function in the  
319 network trained to estimate epidemiological rates, and the categorical cross-entropy loss  
320 function for the categorical network trained to estimate outbreak location. We assessed the  
321 performance of the network by randomly selecting 5,000 samples for validation before each  
322 round of training. We measured the mean absolute error and accuracy using the validation  
323 sets. We used these measures to compare architectures and determine early stopping times  
324 to avoid overfitting the model to the training data. We also added more simulations to the  
325 training set until we could no longer detect an improvement in error statistics. After  
326 comparing the performance of several networks, we found that the CNN described in SI  
327 Figure S1 performed the best. In brief, the networks have three parallel sets of sequential  
328 convolutional layers for the CBLV+S tensor and a parallel dense layer for the priors and  
329 tree statistics. The three sets of convolution layers differed by dilation rate and stride  
330 lengths. These three segments and the dense layer were concatenated and then fed into a  
331 segment consisting of a sequential set of dense layers, each layer gradually narrowing to the

332 output size to either three or five for the rates and origin location networks, respectively,  
333 for the LIBDS model, and seven and five for the seven rates and five locations, respectively,  
334 for the LDBDS model.

335 All layers of the CNN used rectified linear unit (ReLU) activation functions. We  
336 used the Adam optimizer algorithm for batch stochastic gradient descent (Kingma and Ba  
337 2017) with batch size of 128. We selected the number of epochs by monitoring the mean  
338 absolute error and accuracy of the validation data set. This set was not used in training or  
339 testing. These metrics suggested stopping after 15 epochs for the regression network and  
340 ten epochs for the root location network would maximize accuracy/minimize error for  
341 out-of-sample test data. The output layer activation for the network that predicted the  
342  $R_0, \delta$  and  $m$  parameters was linear with three nodes. For the output layer predicting the  
343 outbreak location the activation function was softmax with five nodes for the five locations.  
344 The input layer and all intermediate (latent) layers were the same for all four networks,  
345 namely the CBLV+S tensor and the recovery rate, mean branch lengths, tree height and  
346 number of tips in the tree. The LDBDS neural network was trained with simulated trees  
347 where  $R_{0_i}$  varied among locations and had an output layer with seven nodes; five for the  
348 each location's  $R_{0_i}$  and a node each for the sampling rate and the migration rate. We  
349 tested networks with max-pooling layers between convolution layers as well as dropout at  
350 several rates and found no improvement or a decrease in performance.

### 351 *Likelihood-based method of inference*

352 We compared the performance of our trained phylodynamic CNN to likelihood-based  
353 Bayesian phylodynamic inferences. We specified LIBDS and LDBDS Bayesian models that  
354 were identical to the LIBDS and LDBDS simulation models that we used to train our  
355 CNNs. The most general phylodynamic model in the birth-death family applied to  
356 epidemiological data is the state-dependent birth-death-sampling process (SDBDS;  
357 (Kühnert et al. 2016; Scire et al. 2020)), where the state or type on which birth, death, and

358 sampling parameters are dependent is the location in this context. The basic model used  
359 for experiments here is a phylogeographic model that is similar to the serially sampled  
360 birth-death process (Stadler 2010) where rates do not depend on location, which we refer  
361 to as the LIBDS model. The death rate,  $\mu$ , is equivalent to the recovery rate,  $\gamma$ , in SIR  
362 models. Standard phylogenetic birth-death models assume the birth and death rates,  $\lambda$  and  
363  $\mu$ , are constant or time-homogeneous, while the SIR model's infection rate is proportional  
364 to  $\beta$  and  $S$  and varies with time as  $S$  changes. However, when the number of infected is  
365 small relative to susceptible people, as in the initial stages of an outbreak, the infection  
366 rate,  $\beta$ , is approximately constant and approximately equal to the birth rate  $\lambda$ ;

$$\lambda = \frac{\beta S}{N} \approx \beta \quad (8)$$

367 The joint prior distribution was set to the same model parameter distributions that  
368 were used to simulate the training and test sets of phylogenetic trees in the first section  
369 with  $\gamma$  treated as known and the proportion of extant lineages sampled,  $\rho$ , set to 0.01 as in  
370 the simulations. The likelihood was conditioned on the tree having extant samples (*i.e.* the  
371 simulation ran for the allotted time without being rejected). All simulated trees in this  
372 study had a stem branch and the outbreak origins were inferred for the parent node of the  
373 stem branch.

374 We used Markov chain Monte Carlo (MCMC) to simulate random sampling from  
375 the posterior distribution implemented in the TensorPhylo plugin  
376 (<https://bitbucket.org/mrmay/tensorphylo/src/master/>) in RevBayes (Höhna et al. 2016).  
377 After a burnin phase, a single chain was run for 7,500 cycles with 4 proposals per cycle and  
378 at least 100 effective sample size (ESS) for all parameters. If the effective sample size  
379 (ESS) was less than 100, the MCMC was rerun with a higher number of cycles. We also  
380 analyzed the coverage of the 5, 10, 25, 50, 75, 90, and 95% HPI to verify that our

381 simulation model and inference model are the same and that the MCMC simulated draws  
382 from the true posterior distribution. Bayesian phylogeographic analysis recovered the true  
383 simulating parameters at the expected frequencies (Figure 2 C), thus validating the  
384 simulations were working as expected and confirming that the MCMC was accurately  
385 simulating draws from the true posterior distribution.

### 386 *Quantifying errors and error differences*

387 We measure the absolute percent error (APE) of the predictions from the CNN and the  
388 mean posterior estimate (MPE) of the likelihood-based method. The formula for APE of a  
389 prediction/estimate,  $y^{\text{estimate}}$ , of  $y^{\text{truth}}$  is

$$\text{APE} = \left| \frac{y^{\text{estimate}} - y^{\text{truth}}}{y^{\text{truth}}} \right| \times 100$$

390 The Bayesian alternative to significance testing is to analyze the posterior  
391 distribution of parameter value differences between groups. In this framework, the  
392 probability that a difference is greater than zero can be easily interpreted. We therefore  
393 used Bayesian statistics to infer the median difference in error between the CNN and  
394 likelihood-based methods and the increase in median error of each method when analyzing  
395 misspecified data compared to when analyzing data simulated under the true inference  
396 model.

397 We used Bayesian inference to quantify population error by performing three sets of  
398 analyses: (1) inferred the population median APE under the true model (this will be the  
399 reference group for analysis 3), (2) the effect of inference method — CNN or  
400 likelihood-based (Bayesian) — on error by inferring the median difference between the  
401 CNN estimate and the likelihood-based estimate, (3) the effect of misspecification on error  
402 for each parameter by comparing the median error of estimates under misspecified

403 experiments and the reference group defined by analysis 1. See SI Figures S3 - S13 and SI  
404 Table S1 for summaries and figures for all analyses for this section.

405 To infer these differences between groups we used the R package BEST (Meredith  
406 and Kruschke). BEST assumes the data follow a t-distribution parameterized by a location  
407 parameter,  $\mu$ , a scale parameter,  $\sigma$ , and a shape parameter,  $\nu$ , which they call the  
408 "normality parameter" (*i.e.* if  $\nu$  is large the distribution is more Normal). Because the  
409 posterior distribution does not have a closed form, BEST uses Gibbs sampling to simulate  
410 draws from the posterior distribution. 20,000 samples were drawn from the posterior  
411 distribution for each BEST analysis. BEST uses automatic posterior predictive checks to  
412 indicate that a model adequately describes the data distributions. Posterior predictive  
413 checks indicate the BEST model adequately fits each data set analyzed below.

414 *Inferring the median APE.*— Before inferring differences between groups, we inferred the  
415 population median APE for predictions of  $R_0$ ,  $\delta$ , and  $m$  from test data simulated under the  
416 inference model using the CNN and likelihood-based methods. Histograms of the sampled  
417 log-transformed APE appears to be symmetric with heavy tails so we fit the log APE to  
418 the BEST model. This implies that the sampled APE scores are drawn from a log-t  
419 distribution. The log-t distribution has a mean of  $\infty$  and median of  $e^\mu$ , we therefore focus  
420 our inference on estimating posterior intervals for the population median APE from the  
421 sampled APE values for each parameter estimated by the CNN method and  
422 likelihood-based method which we denote  $\text{APE}^{\text{CNN}}$ , and  $\text{APE}^{\text{Like}}$  respectively. The data  
423 analyzed here and likelihood assumed by BEST is

$$y = \text{APE}^{\text{CNN}} \text{ or } \text{APE}^{\text{Like}}$$

$$\log y \mid \mu, \sigma, \nu \sim t_\nu(\mu, \sigma).$$

424 The priors were set to the vague priors that BEST provides by default,



$$\mu \sim \text{Normal}(\text{mean}(y), \text{sd}(y) \times 1000)$$

$$\sigma \sim \text{Uniform}(\text{sd}(y)/1000, \text{sd}(y) \times 1000)$$

$$\nu \sim \text{Exponential}(1/29) + 1.$$

425 95% HPI for the median APE,  $\tilde{\mu}$ , was estimated by the following transformation of  
426 simulated draws from the posterior distribution

$$\tilde{\mu} = e^{\mu}.$$

427 In summary, the results we present are 95% HPI from the posterior distributions of  
428 the median error,  $\tilde{\mu}$ .

429 *Inferring the relative accuracy of the CNN and likelihood-based method.*— To quantify the  
430 difference in error between the CNN and the likelihood-based method, we fit the difference  
431 in sampled APE scores,  $\Delta\text{APE}$ , between the CNN method and the likelihood-based  
432 method to the BEST model. Histograms of  $\Delta\text{APE}$  appear symmetric with weak to strong  
433 outliers making the BEST model a good candidate for inference from this data. The data  
434 and likelihood are

$$\Delta y = \text{APE}^{\text{CNN}} - \text{APE}^{\text{Like}}$$

$$\Delta y \mid \mu, \sigma, \nu \sim t_{\nu}(\mu, \sigma)$$

435 We used the same default priors as above.

436 Because,  $\Delta y$  is not log-transformed, it is drawn from a t-distribution and the

437 marginal posterior of the parameter  $\mu$  is an estimate of the population mean,  $\mu^d$ . Because  
438 the mean and the median are equivalent for a t-distribution, we again report the posterior  
439 distribution of the median difference,  $\tilde{\mu}^d$  to simplify the results.

440 In summary, the results we present are 95% HPI from the posterior distribution of  
441 the median difference between the two methods,  $\tilde{\mu}^d$ .

442 When comparing CNN to the likelihood-based approach, positive values for  $\tilde{\mu}^d$   
443 indicate the CNN is less accurate, and negative indicate the likelihood-based estimates less  
444 accurate. We emphasise that this quantity is the median difference in contrast to the  
445 difference in medians,  $\Delta\tilde{\mu}$ , reported in the next section.

446 *Inferring sensitivity to model misspecification.*— Finally, to quantify the overall sensitivity  
447 of each rate parameter to model misspecification under each inference method, we infer the  
448 difference in median APE,  $\tilde{\mu}$  of predictions under a misspecified model relative to  
449 predictions under the true model. In other words we are inferring differences in medians  
450 between experiments. For example, to infer the sensitivity of the CNN’s inference of the  
451 sampling rate,  $\delta$ , to phylogenetic error, we inferred the difference between the median APE  
452 of the CNN’s predictions for misspecified trees and the median APE of CNN predictions  
453 for true trees. The data is concatenated as below.

$$(y_1, y_2) = (\text{APE}^{\text{CNN}}, \text{APE}^{\text{CNN Ref}}) \text{ or}$$
$$(y_1, y_2) = (\text{APE}^{\text{Like}}, \text{APE}^{\text{Like Ref}})$$

454 We inferred the difference between group median APE scores, denoted  $\Delta\tilde{\mu}$ , by  
455 assuming that the model parameters conditioned on the observed APE from the two  
456 groups,  $y_1$  and  $y_2$ , follow a posterior distribution that is proportional to

$$P(y_1 | \mu_1, \sigma_1, \nu)P(y_2 | \mu_2, \sigma_2, \nu)P(\mu_1, \mu_2, \sigma_1, \sigma_2, \nu),$$

457 where  $\log y_1$  and  $\log y_2$  follow t distributions with means  $\mu_1$  and  $\mu_2$  and standard  
458 deviations  $\sigma_1$  and  $\sigma_2$ , respectively while sharing a common normality parameter,  $\nu$ .

459 The posterior sample of  $\Delta\tilde{\mu}$  is obtained by transforming samples from the joint  
460 marginal posterior distribution of  $\mu_1$  and  $\mu_2$  with the following equation,

$$\Delta\tilde{\mu} = e^{\mu_1} - e^{\mu_2}.$$

461 The two components of the likelihood are each t-distributed and share the  $\nu$   
462 parameter which means we assume both samples are drawn from a similarly shaped  
463 distribution (similarly heavy tails).

$$\log y_1 | \mu_1, \sigma_1, \nu \sim t_\nu(\mu_1, \sigma_1)$$

$$\log y_2 | \mu_2, \sigma_2, \nu \sim t_\nu(\mu_2, \sigma_2)$$

464 The prior distribution for the parameters of the model were set to the defaults for  
465 BEST,

$$\mu_1 \sim \text{Normal}(\text{mean}(\log y_1), \text{sd}(\log y_1) \times 1000)$$

$$\mu_2 \sim \text{Normal}(\text{mean}(\log y_2), \text{sd}(\log y_2) \times 1000)$$

$$\sigma_1 \sim \text{Uniform}(\text{sd}(\log y_1)/1000, \text{sd}(\log y_1) \times 1000)$$

$$\sigma_2 \sim \text{Uniform}(\text{sd}(\log y_2)/1000, \text{sd}(\log y_2) \times 1000)$$

$$\nu \sim \text{Exponential}(1/29) + 1$$

466 As before, interpretation of the posterior distribution of the difference in medians is  
467 straightforward: the more positive the difference in median APE from the misspecified  
468 model test set and the median APE from the true model test set, the more sensitive the  
469 parameter is to model misspecification in the experiment.

### 470 *CNN uncertainty quantification*

471 We used conformalized quantile regression (CQR) to construct calibrated probability  
472 intervals (CPI), ensuring accurate predictive coverage (Lei et al. 2018; Romano et al. 2019;  
473 Sousa et al. 2022; Vovk et al. 2022; Angelopoulos et al. 2023). CQR is implemented in two  
474 stages: first a network is trained to predict conditional quantiles, then a hold-out simulated  
475 dataset is used to estimate bias adjustment terms to ensure correct coverage on future data  
476 *i.e.* 95% intervals contain the true value 95% of the time for test data.

477 To implement quantile regression with a neural network and predict lower and upper  
478 quantiles, we adjusted the general network architecture used for point estimates above to  
479 have two outputs each with a mean pinball loss function instead of the mean squared error,

$$L_\tau(y, \hat{q}) = \frac{1}{N} \sum_i^N [(y_i - \hat{q}_i)\tau \mathbb{1}\{y_i \geq \hat{q}_i\} + (\hat{q}_i - y_i)(1 - \tau) \mathbb{1}\{y_i \leq \hat{q}_i\}].$$

480 Here,  $y$  is the label or true parameter value (not a quantile) and  $\hat{q}$  is the trained neural  
 481 network’s prediction of a given quantile.  $\tau$  is the quantile level and is equal to  $1 - \alpha$ , where  
 482  $\alpha$  is the mis-coverage rate, or the probability the true value is not below the quantile. To  
 483 estimate inner quantiles with miscoverage rate  $\alpha$ , the lower quantile output was set to  
 484 predict the  $\alpha/2$  quantile for each rate parameter and the other layer to predict the  $1 - \alpha/2$   
 485 upper quantile (Steinwart and Christmann 2011) (SI figure S2). We refer to CNNs of this  
 486 type as qCNN. Though often close, these inner quantiles are not guaranteed to have the  
 487 correct coverage on test data sets (Figure 3) necessitating the calibration  
 488 (conformalization) step (Romano et al. 2019).

489 To calibrate the predictions of quantile regression neural networks, CQR finds an  
 490 adjustment term for each quantile through computing a non-conformity score, such as the  
 491 distance of the predicted value from the predicted quantile. If the estimated quantile is  
 492 well calibrated, then the same quantile of the scores in a calibration set will be zero. If the  
 493 estimated quantile is, for example, too high then too high a proportion of the labels will  
 494 fall below the estimated quantile and the empirical quantile,  $Q$ , of the nonconformity score  
 495  $y - \hat{q}$  at  $1 - \alpha/2$  will be negative. In other words it will over cover the calibration set.  $Q$   
 496 thus becomes the adjustment term for calibrating the qCNN’s quantile estimate (equations  
 497 9, and 10) by simply adding the term to the corresponding estimated quantile as shown in  
 498 equation 11.

$$Q_{\text{lower}} \text{ s.t. } P(y - \hat{q}_{\text{lower}} < Q_{\text{lower}}) = \frac{\alpha}{2} \left(1 + \frac{1}{n}\right) \quad (9)$$

$$Q_{\text{upper}} \text{ s.t. } P(y - \hat{q}_{\text{upper}} < Q_{\text{upper}}) = \left(1 - \frac{\alpha}{2}\right) \left(1 + \frac{1}{n}\right) \quad (10)$$

499

$$\text{CPI} = [\hat{q}_{\text{lower}} + Q_{\text{lower}}, \hat{q}_{\text{upper}} + Q_{\text{upper}}] \quad (11)$$

500 Note that the quantiles of the score for finite sample sizes require adjustment by  $(1 + \frac{1}{n})$   
 501 where  $n$  is the number of samples in the calibration set (Romano et al. 2019).

502 We simulated 108,559 more datasets (trees) to estimate the calibration amounts for  
503 the upper and lower qCNN-estimated quantiles. After calibration through  
504 conformalization, we clipped intervals to the prior boundary for intervals that extended  
505 beyond the prior distribution's range. To examine the consistency of quantile regression for  
506 neural networks trained on different quantiles we trained seven different quantile networks  
507 to predict the same quantiles used for validating our Bayesian analysis and simulation  
508 model: {0.05, 0.25, 0.5, 0.75, 0.9, 0.95}. We checked the coverage of these adjusted CPIs  
509 on another simulated test dataset of 5,000 trees.

### 510 *Real data*

511 We compared the inferences of a LDBDS simulation trained neural network to that of a  
512 phylodynamic study of the first COVID wave in Europe (Nadeau et al. 2021). These  
513 authors analyzed a phylogenetic tree of viruses sampled in Europe and Hubei, China using  
514 a location-dependent birth-death-sampling model in a Bayesian framework using priors  
515 informed by myriad other sources of information. We simulated a new training set of trees  
516 under an LDBDS model where  $R_{0,i}$  depends on the geographic location, and the sampling  
517 process only consists of serial sampling and no sampling of extant infected individuals. We  
518 estimated 95% CPIs for model parameters with a simulated calibration dataset of 101,219  
519 trees using CQR as above and confirmed accurate coverages with another dataset of 5,000  
520 trees.

521 We then analyzed the whole tree from Fig. 1 in (Nadeau et al. 2021) as well as the  
522 European clade which Nadeau et al. (2021) labeled as A2 in the same figure. We note that  
523 our simulating model is not identical to the inference model used in (Nadeau et al. 2021).  
524 We model migration with a single parameter with symmetrical migration rates among  
525 locations and all locations having the same sampling rate. Nadeau and colleagues  
526 parameterize the migration process with asymmetric pairwise migration rates and assume  
527 location-specific sampling rates. We also do not include the information the authors used

528 to inform their priors as that requires an extra level of simulation and training on top of  
529 simulations done here, and is thus beyond the scope of this study.

530 The time tree from (Nadeau et al. 2021) was downloaded from GitHub  
531 (<https://github.com/SarahNadeau/cov-europe-bdmm>). The recovery rate assumed in  
532 (Nadeau et al. 2021) was  $0.1 \text{ days}^{-1}$  which was set to 0.05 to bring the recovery rate to  
533 within the range of simulating values used to train the CNN. Consequently, the branch  
534 lengths of the tree were then scaled by 2. The number of tips, tree height, and average  
535 branch lengths were measured from the rescaled trees and fed into the network. The full  
536 tree and A2 clade were then analyzed using the LDBD CNN and compared to the posterior  
537 distributions from (Nadeau et al. 2021).

### 538 *Hardware used*

539 Simulations were run on a 16 core Intel(R) Xeon(R) Platinum 8175M CPU @ 2.50GHz.  
540 For each simulation, an XML file with random parameter settings was generated using  
541 custom scripts. These XML files were the inputs for MASTER which was run in the  
542 BEAST2 platform. Neural network training and testing and predictions were conducted on  
543 an 8 core Intel(R) Core(TM) i7-7820HQ CPU @ 2.90GHz laptop with a NVIDIA Quadro  
544 M1200 GPU for training.

## 545 RESULTS

### 546 *Comparing deep learning to likelihood*

547 Our first goal in this study was to train a CNN that produced phylodynamic parameter  
548 point estimates that were as accurate as likelihood-based Bayesian posterior mean  
549 estimates under the true model. This will serve as a reference for quantifying level of  
550 sensitivity in our misspecification experiments. Using viral phylogenies like those typically

551 estimated from serially sampled DNA sequences, we focused on estimating important  
552 epidemiological parameters – the reproduction number,  $R_0$ , the sampling rate,  $\delta$ , the  
553 migration rate,  $m$ , and the outbreak origin.

554 Our CNN produced estimates that are as accurate as the mean posterior estimates  
555 (MPE) under the true simulating model. We compared the absolute percent error (APE)  
556 of the network predictions to the APE of the MPE of the Bayesian location-independent  
557 birth-death-sampling (LIBDS) model (Figure 2). The APE is straight-forward to interpret,  
558 e.g. an APE of  $< 10$  means the estimate is within 10 percentage points (ppts) of the true  
559 value. For the three epidemiological rate parameters,  $R_0$ ,  $\delta$  and  $m$ , both methods made  
560 very similar predictions for the 100 time tree test set (Figure 2 panel A). The two methods  
561 appear to produce estimates that are more similar to each other than to the ground truth  
562 labels (compare bottom row scatter plots in orange to the blue and red scatter plots in  
563 panel A). Fig. 2 panel B shows that the inferred median difference in APE,  $\tilde{\mu}^d$ , between  
564 the method’s estimates for the three parameters is close to zero ( $|\tilde{\mu}^d|$  95% HPI is  $< 4$   
565 ppts; SI Table S1; SI Figure S3).

566 We also compared the performance of uncertainty quantification using  
567 quantile-CNN-based conformalized quantile regression (CQR; Romano et al. 2019) to that  
568 of Bayesian HPIs for each of the experiments. We trained seven qCNNs to predict  
569 inner-quantiles at seven different levels to compare with the Bayesian HPIs;  $\tau = \{0.05, 0.1,$   
570  $0.25, 0.5, 0.75, 0.9, 0.95\}$ . We then used another simulated dataset to calibrate predicted  
571 intervals which we refer to as CPIs which theoretically have correct coverage properties  
572 (Romano et al. 2019) like the HPIs. For the test dataset of 138 trees, the CPIs had  
573 coverages that matched well with expectations to a comparable degree to the Bayesian HPI  
574 (Figure 2 panel C) though more variable. To further confirm that our CQR procedure was  
575 adequately calibrating the qCNN estimates, we confirmed correct coverages of CPIs for a  
576 much larger dataset with 5,000 trees (Figure 3). On average, the widths of CPIs in the set  
577 of 138 trees shown in (Figure 2) was about 20 - 40% wider than that of the corresponding



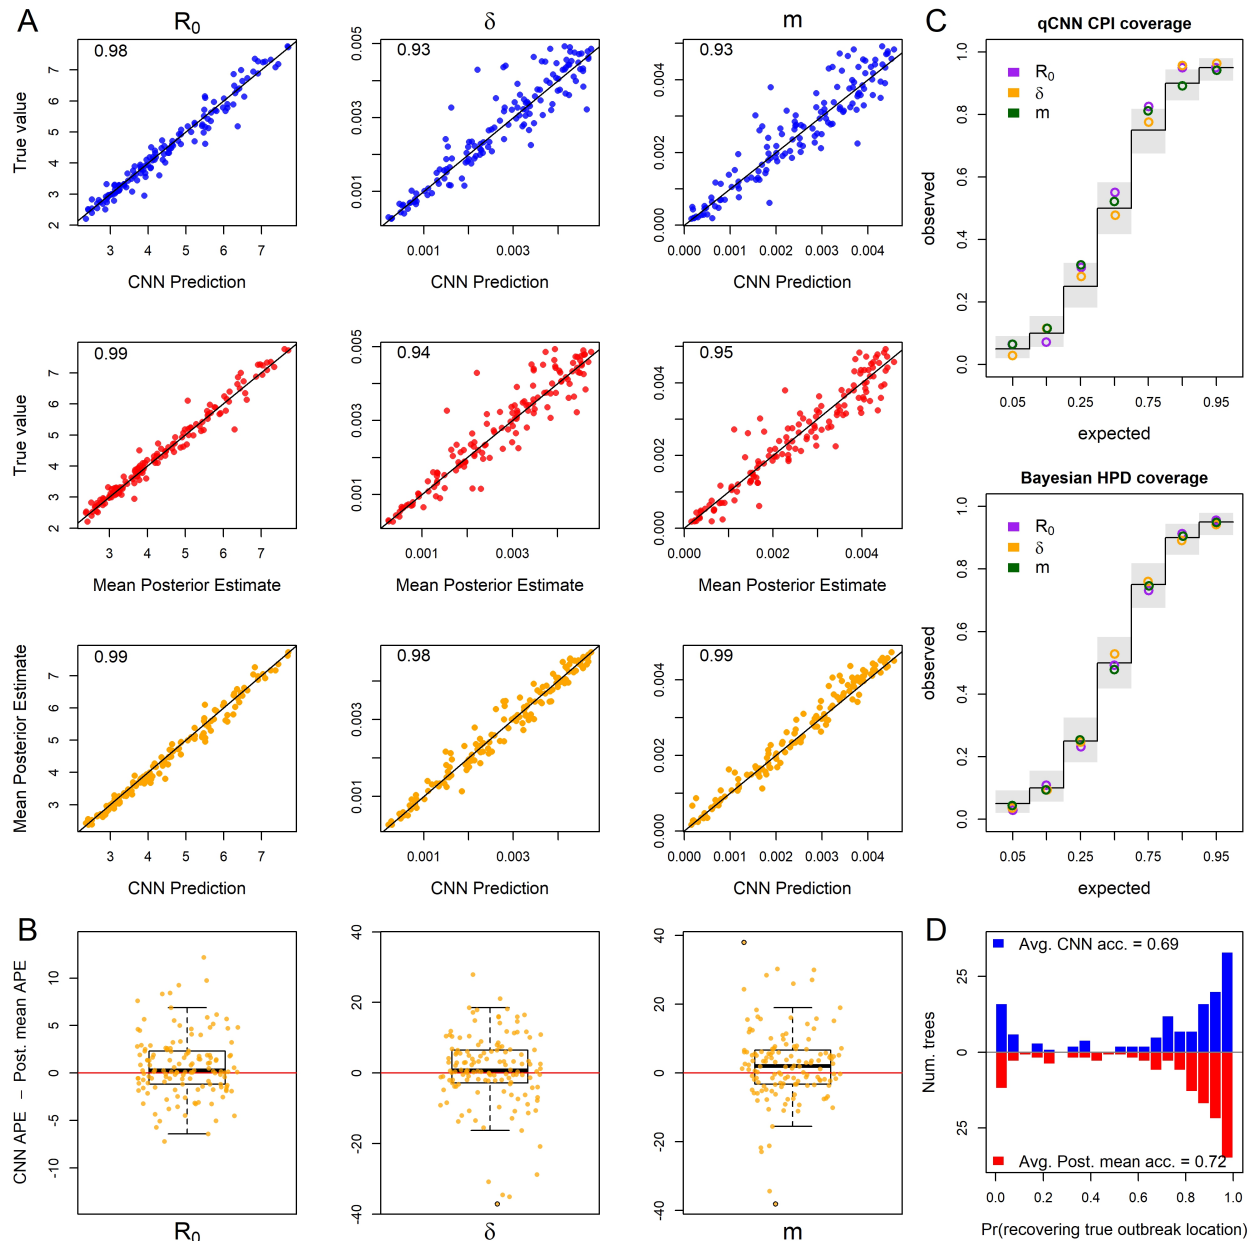

Figure 2: Inference under the true simulating model. (A) Scatterplot of CNN predictions and posterior mean estimates from Bayesian analyses against the true values (top two rows in blue and red respectively) of the basic reproduction number,  $R_0$ , the sampling rate,  $\delta$ , and the migration rate,  $m$  for 138 test trees. In the upper-left corners of the scatter plots are the correlations of the plotted data. The bottom row in orange shows scatter plots of the CNN estimates against the posterior mean estimates for the same trees. (B) The difference in the absolute percent error (APE) of estimates for the two inference methods. Boxes show the inner 50% quantile of the data while whiskers extend 1.5 IQR. Dots with black circles were truncated to  $2 \times$  the length of whiskers for visualization purposes. (C) Coverage plots show the expected frequency of coverage for each of the categories and the observed frequencies (black steps and colored circle respectively). Gray boxes are the expected 95% confidence intervals at each of the expected coverage values which follows a  $\text{Beta}((n+1)q, n-(n+1)q+1)$  distribution. (D) Histograms of the probabilities of inferring the correct outbreak origin location.

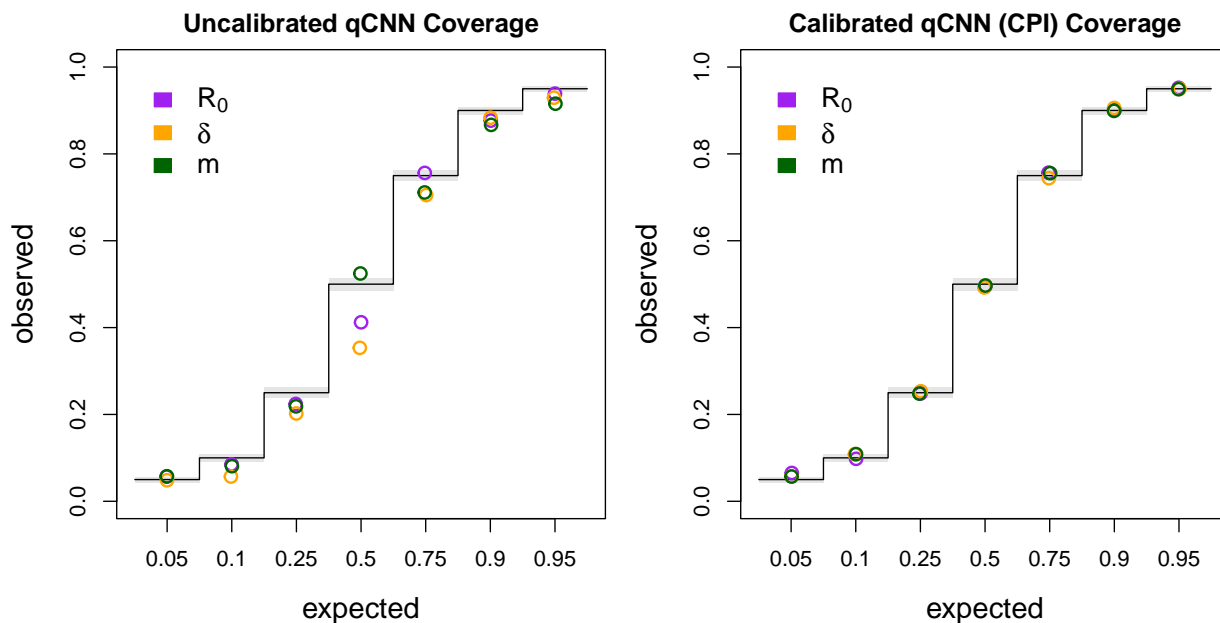

Figure 3: Coverage of uncalibrated qCNN quantile predictions (left) and calibrated qCNN which produce “calibrated probability intervals” (CPI) on the right. The observed coverage of 5,000 samples tested at seven different predicted coverage levels (labeled horizontal). See Figure 2 C for more details on coverage plots.

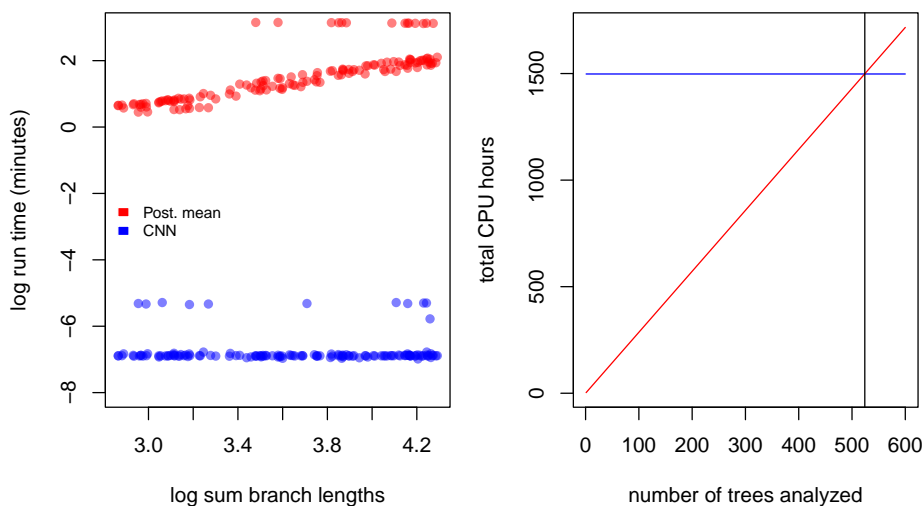

Figure 4: Left: Estimates of time to complete analysis of each of 138 trees relative to tree size. Right: The number of trees (524; gray vertical line) needed to analyze for total analysis time of Bayesian method (red line) to equal that of the entire simulation and CNN training and inference pipeline (blue line).

578 HPI and Jaccard similarity index ranging from 0.66 to 0.75 suggesting a high degree of  
579 overlap between the intervals (SI Figure S4 and SI Table S2). These results indicate the  
580 probability level of the CPI, *e.g.* 95%, can be safely interpreted as the probability a  
581 parameter falls within the CPI. The wider intervals suggest the basic CQR method  
582 employed here is somewhat less precise and thus more conservative than the Bayesian  
583 method.

584 Our trained CNN provides nearly instantaneous estimates of model parameters.  
585 While the run time of the likelihood approach employed in this study scales linearly with  
586 the size of the tree, the neural network has virtually constant run times that are more than  
587 three orders of magnitude faster. Because simulation-trained neural networks have a  
588 one-time cost of simulating the training data set and then training the neural network,  
589 these methods are often called amortized-approximators (Bürkner et al. 2022). This means  
590 the time savings aren't recouped until a certain number of trees have been analyzed. For  
591 example, here over 524 trees would need to be analyzed to realize the cost savings of  
592 simulating data and training our neural network (Figure 4). This illustrates the importance  
593 of simulation optimization and generality for likelihood-free approaches to inference.

### 594 *Comparing sensitivity to model misspecification*

595 To test the relative sensitivity of CNN estimates and the likelihood-based MPE to model  
596 misspecification, we simulated several test data sets under different, more complex  
597 epidemic scenarios and compared the decrease in accuracy (increase in APE).

598 Our first model misspecification experiment tested performance when assuming all  
599 locations had the same  $R_0$  when, in fact, each location had different  $R_{0i}$  values. The  
600 median APE for all three parameters increased to varying degrees (SI Fig. S5 Panel A)  
601 compared to the median APE measured in Fig. S3. We found that both methods  
602 converged on similar biased estimates for  $R_0$ . In both the CNN and Bayesian method,  
603 estimates of  $\delta$  were relatively robust to misspecifying  $R_0$ . In contrast, the migration rate

604 showed much more sensitivity to this model violation in both methods with both methods  
605 also converging on similarly biased estimates (Figure 5 A). The median difference in error  
606 between the two methods is close to zero for all rate parameters ( $|\tilde{\mu}^d|$  | 95% HPI < 6 ppts;  
607 SI Table S1) (SI Figure S5 Panel B). For both methods of uncertainty quantification the  
608 coverage declined by similar amounts for all three parameters with  $\delta$  showing little to no  
609 sensitivity to  $R_0$  misspecification (Figure 5 panel C and SI Table S2). The patterns of  
610 coverage are also somewhat less regular across the qCNN quantiles than the HPIs for the  
611 migration rate parameter likely due in part to the fact that each inner quantile qCNN was  
612 trained independently and thus have independent errors. The relative interval widths and  
613 Jaccard similarity indexes did not change appreciably from predictions under the true  
614 model (SI Figure S4 and SI Table S2). Our CNN appears to be slightly more sensitive than  
615 the Bayesian approach when predicting the outbreak location. Nevertheless, their  
616 distributions are quite similar (Figure 5 Panel C).

617         Next, we measured method sensitivity when the sampling process of the test trees  
618 violates assumptions in the inference model. In this set, each location had a unique and  
619 independent sampling rate,  $\delta$ , rather than a single  $\delta$  shared among locations. The median  
620 APE only increased for  $\delta$  and  $m$  (SI Figure S7 Panel A). As expected, estimates of  $\delta$  were  
621 highly biased for both methods (Figure 6 panel A). Panel A also shows that  $R_0$  is virtually  
622 insensitive to sampling model misspecification, but that migration rate, again, is highly  
623 sensitive in both the CNN and likelihood method. The median difference in error between  
624 the two methods is close to zero for all the rate parameters ( $|\tilde{\mu}^d|$  | 95% HPI < 5 ppts; SI  
625 Table S1, SI Figure S7) (Figure 6 panel B). For both methods coverage declined for  $\delta$  and  
626  $m$ , while  $R_0$  showed little to no sensitivity to  $\delta$  misspecification (Figure 6 panel C and SI  
627 Table S2). The relative widths and degree of overlap was again similar to the experiments  
628 above (SI Figure S8, SI Table S2). We again also see greater irregularity among CPI levels  
629 in coverage, notably  $\delta$  at inner-quantile level 0.9. The location of outbreak prediction is  
630 also somewhat sensitive in both methods, with the CNN showing a slightly larger mean

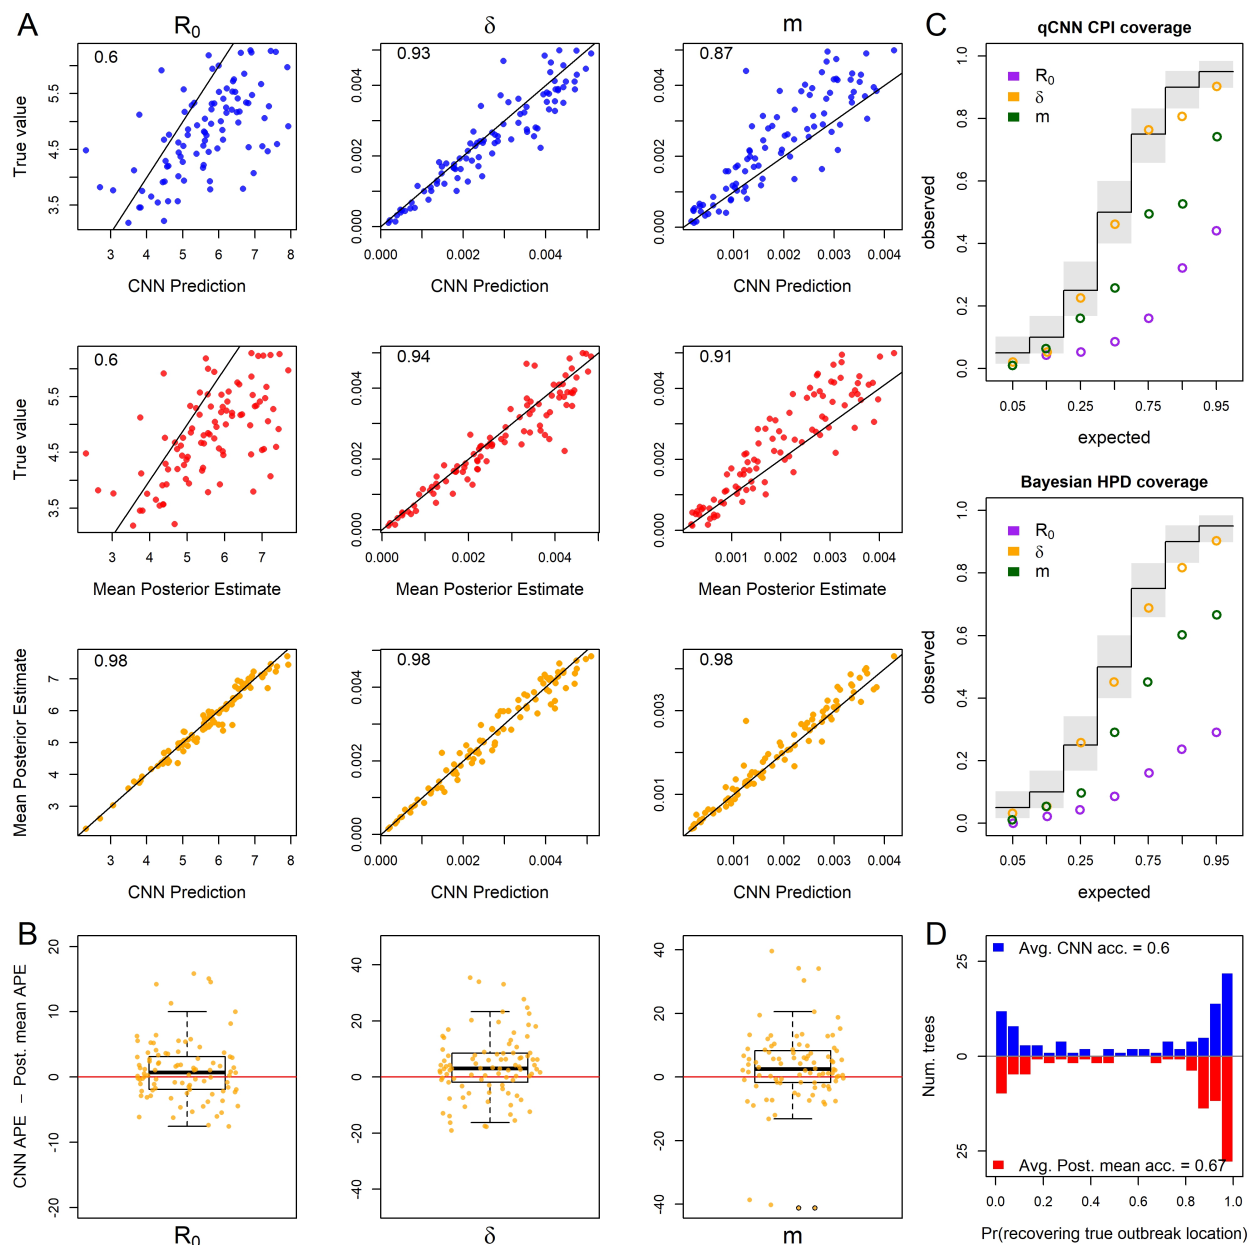

Figure 5: For 93 test trees where the  $R_0$  parameter was misspecified: the simulating model for the test data specified 5 unique  $R_0$ s among the five locations while the inference methods assumed one  $R_0$  shared among locations. Because of this, the estimates for  $R_0$  are plotted against mean of the five true  $R_0$  values. See Figure 2 for general details about plots.

631 difference, but the overall distribution of accuracy of all the test trees again is similar  
 632 (Figure 6 panel C).

633 To explore sensitivity to migration model underspecification, we simulated a test set  
 634 where the migration rates between locations is free to vary rather than being the same

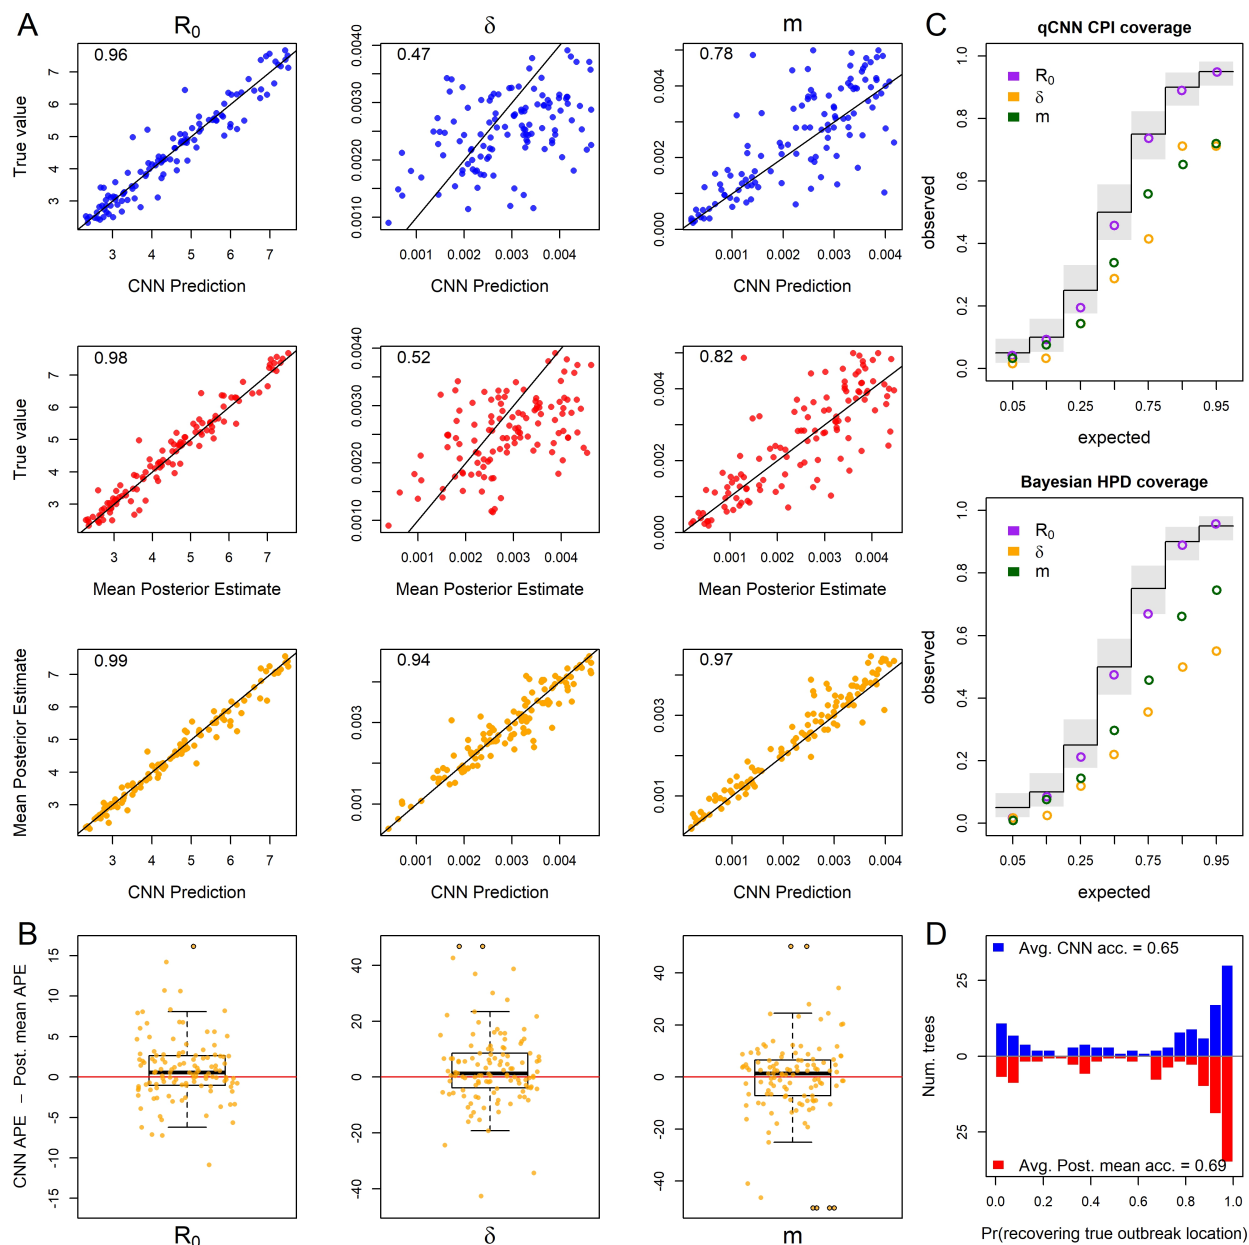

Figure 6: For 118 test trees where the sampling rate parameter was misspecified: the simulating model for the test data specified 5 unique sampling rates among the five locations while the inference methods assumed one sampling rate shared among locations. The estimates of  $\delta$  are plotted against the mean true values of  $\delta$ . See Figure 2 for general details about plots.

635 among locations as in the inference model. This implies  $5!$  unique location-pairs and thus  
 636 unique migration rates in the test data set. Results show that for both methods the  
 637 parameters  $R_0$  and  $\delta$  are highly robust to this simplification (SI Fig. S9 Panel A). Though

638 estimates of a single migration rate had a high degree of error compared to a single pair of  
639 locations' migration rates (Figure 7 panel A), the two methods still had similar estimates  
640 with the difference in APE centered near zero (Figure 7 panel B). The inferred median  
641 difference in APE was close to zero ( $|\tilde{\mu}^d|$  95% HPI < 3 ppts; SI Table S1; SI Figure S9  
642 Panel B). For both methods the coverage only declined significantly for the migration rate  
643 and the decrease was again similar in magnitude across quantiles (Figure 7 panel C and SI  
644 Table S2). Again, relative widths and degree of overlap of CPI and HPI were similar to  
645 previous experiments (SI Figure S10, SI Table S2) There was a slight but similar decrease  
646 in accuracy in predicting the outbreak location for both methods (Figure 7 panel C).

647         When testing the sensitivity of the two methods to arbitrary groupings of locations,  
648 we found that both methods showed equal sensitivity to the same parameters (Fig. 8  
649 Panels A and B). In particular, the migration rate showed a modest increase in median  
650 APE and  $R_0$  and sample rate showed virtually no sensitivity to arbitrary grouping of  
651 locations (SI Figure S11 Panel A). The inferred median difference between method APE's  
652 was again close to zero ( $|\tilde{\mu}^d|$  95% HPI < 4 ppts; SI Table S1; SI Figure S11 Panel B). For  
653 both methods the coverage declined modestly only for the migration rate (Figure 5 panel C  
654 and SI Table S2). Relative widths and interval overlap showed virtually no change (SI  
655 Figure S12 and SI Table S1). These results suggest that for at least the exponential phase  
656 of outbreaks where rate parameters do not vary among locations, these models have a fair  
657 amount of robustness to the decisions leading to geographical division of continuous space  
658 into discrete space. The outbreak location showed higher accuracy in both methods due to  
659 the fact that the test data was no longer a flat distribution; the 6 combined locations  
660 should contain 60% of the outbreak locations (Figure 8 panel C).

661         Finally, we explored the relative sensitivity of our CNN to amounts of phylogenetic  
662 error that are present in typical phylogeographic analyses. Our simulated phylogenetic error  
663 produced trees with average Jaccard similarity indexes between the inferred tree and the  
664 true tree of about 0.5 with 95% of simulated trees having distances within 0.36 and 0.72.



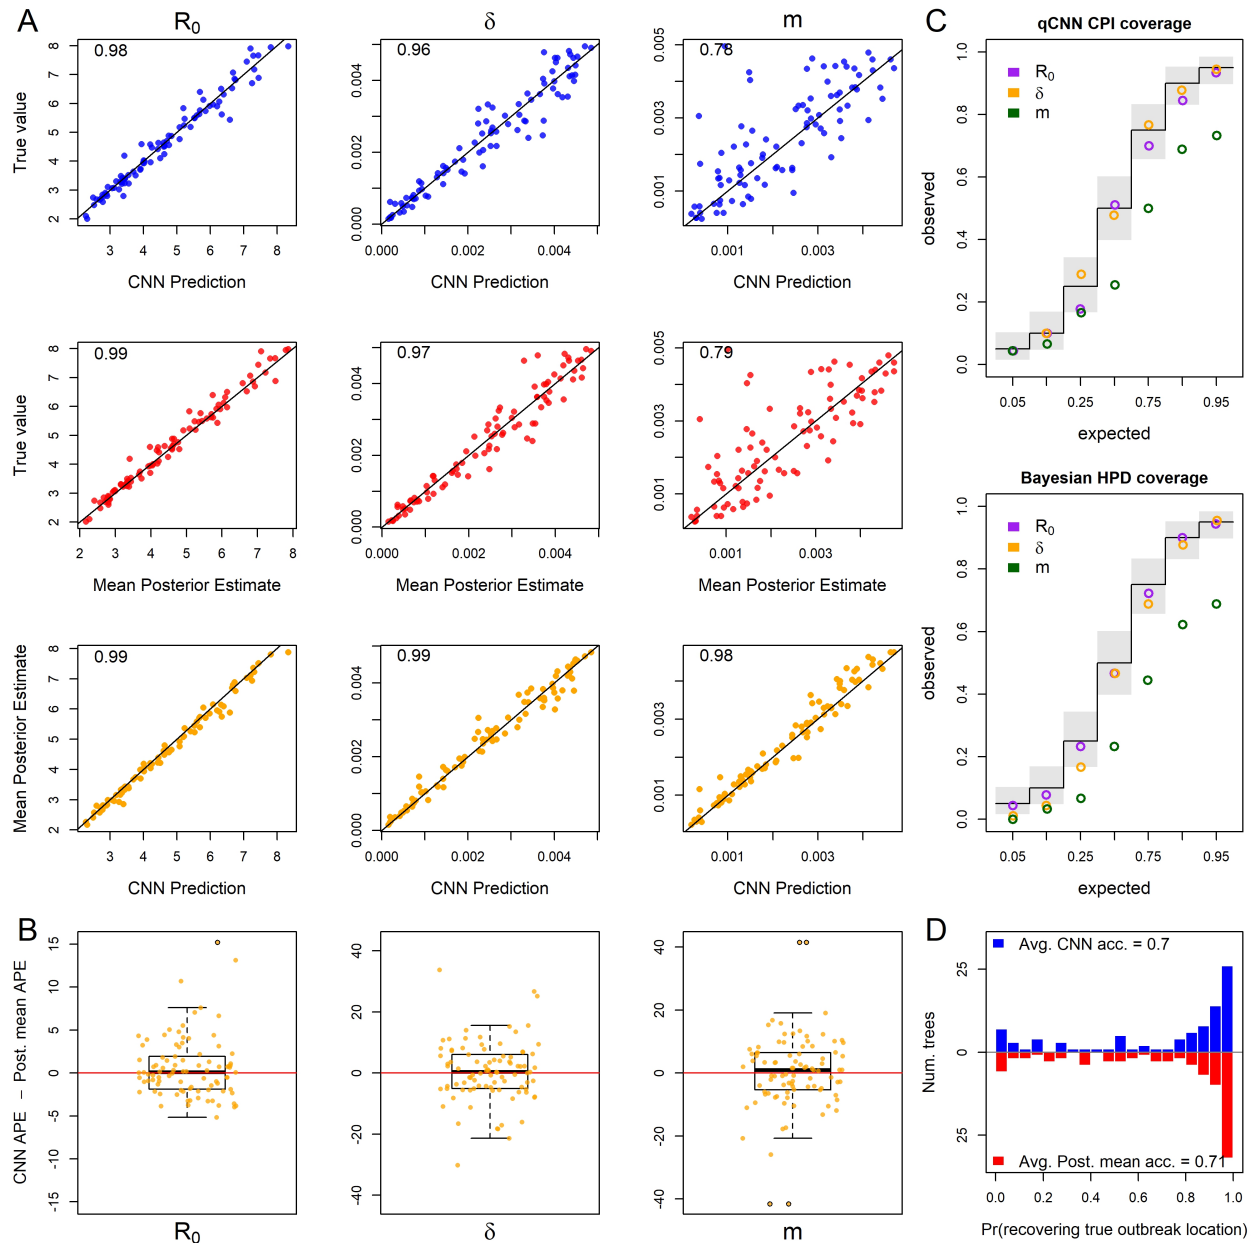

Figure 7: For 90 test trees where the migration rate parameter was misspecified: the simulating model for the test data specified 5! (120) unique migration rates among the unique pairs of the five locations while the inference methods assumed all migration rates were equal. The inferred migration rate is plotted against the mean pairwise migration rates of test data set. See Figure 2 for general details about plots.

665 We again compared inferences derived from the true tree and the tree with errors using the  
 666 CNN and the Bayesian LIBDS methods. Results show that migration rate was minimally  
 667 affected but  $R_0$  and  $\delta$  were to a some degree sensitive to phylogenetic error (Figure 9 panel



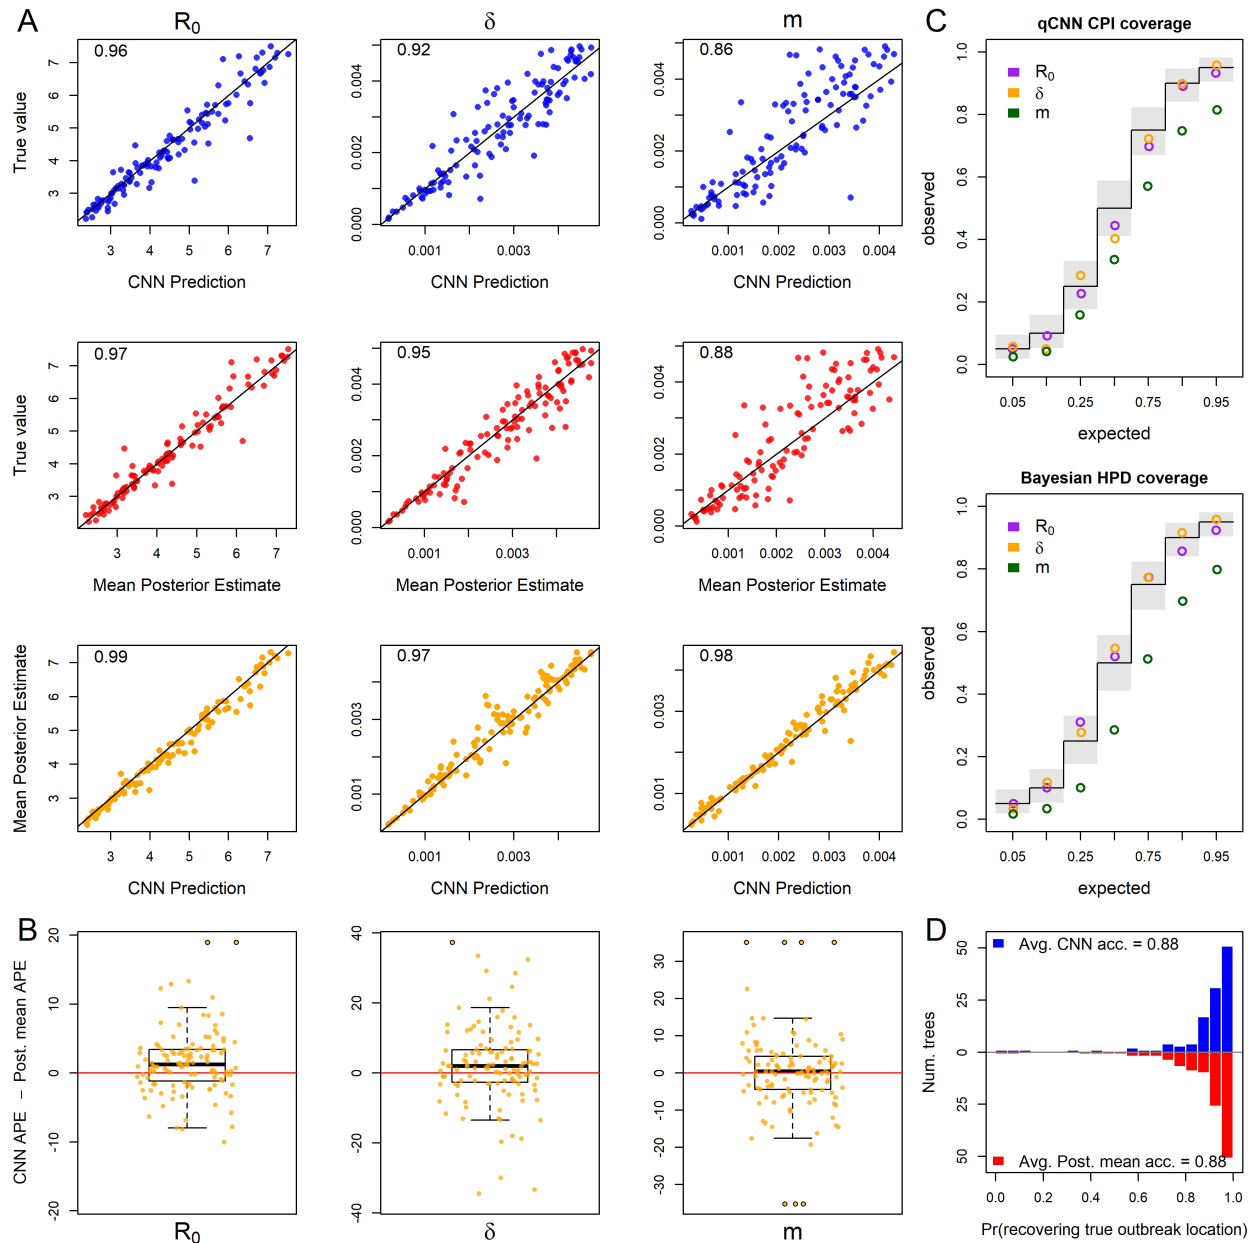

Figure 8: For 101 test trees where the number of locations was misspecified: the simulating model for the test data specified an outbreak among 10 locations with 6 locations subsequently combined into a single location while the inference methods assumed 5 locations with no arbitrary combining of locations. See Figure 2 for general details about plots.

668 A; SI Figure S13 Panel A), with both methods again showing similar degrees of sensitivity  
 669 (Figure 9 panel B). The inferred median difference was, yet again, small ( $|\tilde{\mu}^d|$  95% HPI  
 670  $< 6$  ppts. SI Table S1, SI Figure S13 Panel B). Coverages of  $\delta$  declined for both methods in  
 671 a similar way across quantiles. Again the 90% inner quantile showed some inconsistency

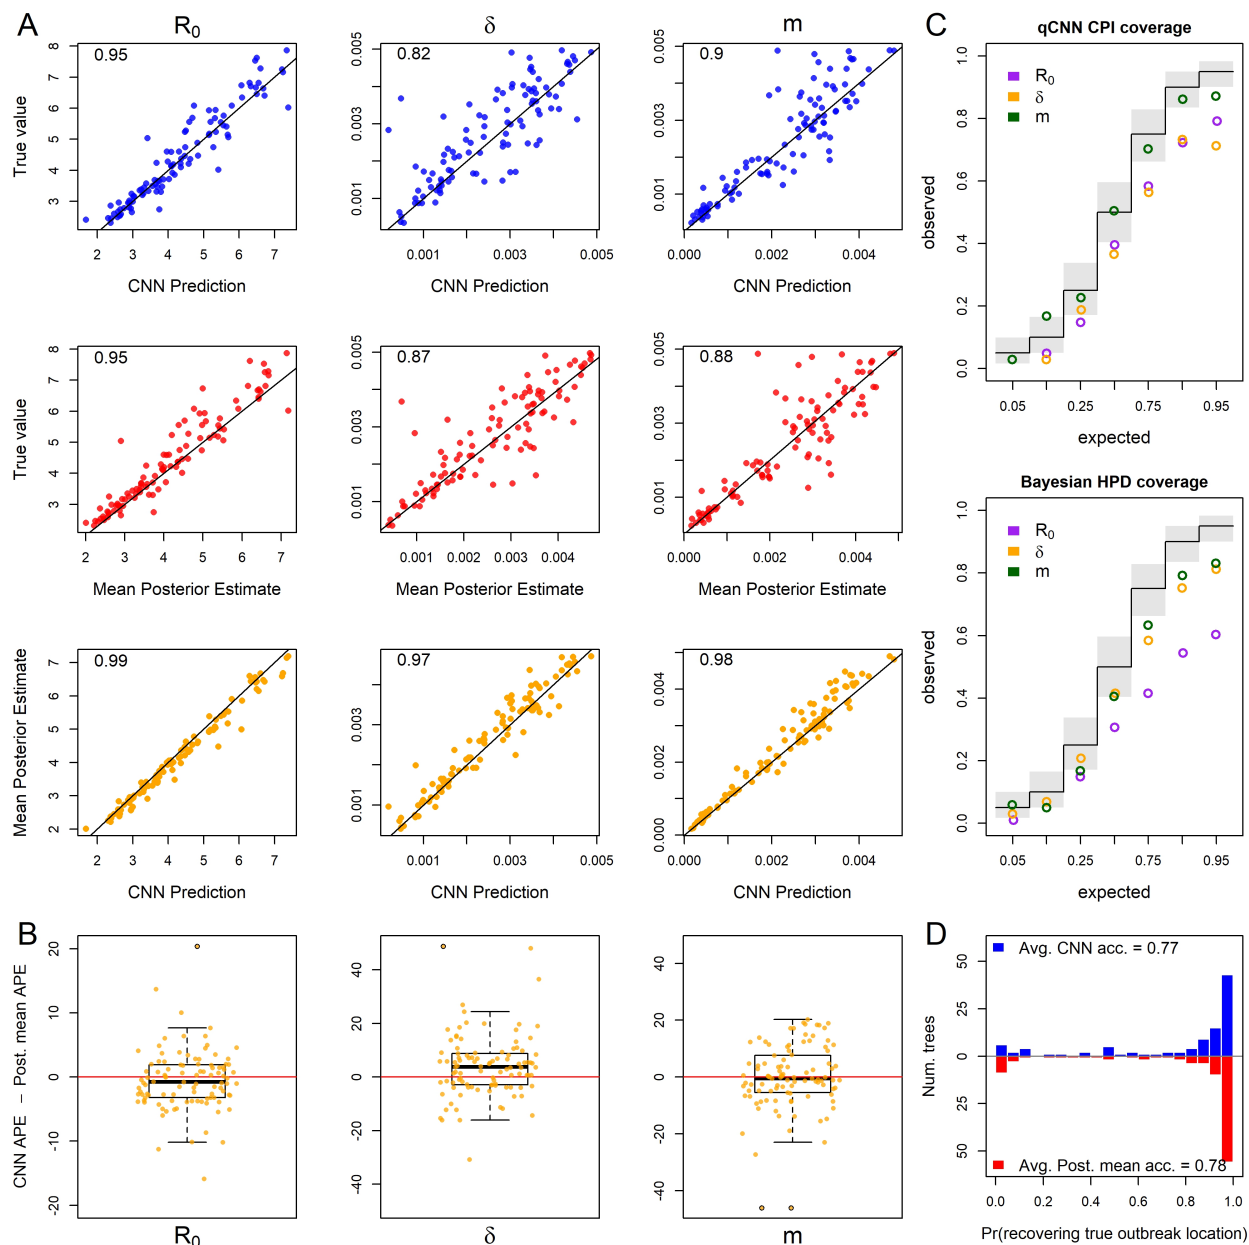

Figure 9: For 118 test trees where the time tree was misspecified: the true tree from the simulated test set was replaced with an inferred tree from simulated DNA alignments under the true tree. See Figure 2 for general details about plots.

672 with its neighboring quantiles. In this case its coverage for  $\delta$  was slightly higher than the  
 673 95th inner quantile. The CPIs for  $R_0$  appear much less sensitive (Figure 9 panel C and SI  
 674 Table S2). Although the relative widths of the CPIs and HPIs were similar to previous  
 675 experiments, the degree of overlap decreased somewhat by about 5 - 10% (SI Figure S14

676 and SI Table S2). One difference between this experiment and the others, is that trees are  
677 data instead of model parameters. It is interesting that the point estimates from the two  
678 methods show similar biases while the coverages seem to depart somewhat. Inference of the  
679 origin location, were very similar for both methods (Fig. 9 Panel C).

### 680 *Analysis of SARS CoV-2 tree*

681 We next compared our likelihood-free method to a recent study investigating the  
682 phylodynamics of the first wave of the SARS CoV-2 pandemic in Europe (Nadeau et al.  
683 2021). Despite simulating the migration and the sampling processes differently from  
684 Nadeau et al. (2021), our CNN produces similar estimates for the location-specific  $R_0$  and  
685 the origin of the A2 clade (Figure 10). Whether the full tree or just the A2 clade is fed into  
686 the network, the predicted  $R_0$  for each location was not far from the posterior estimates of  
687 Nadeau et al. (2021). For the most part the  $R_0$  95% CPI for each location overlaps to a  
688 high degree with the 95% HPI and is roughly 1.5 times wider indicating that our CNN  
689 estimates are relatively conservative. For Hubei the interval width of the a2 clade is much  
690 wider than the estimate using the whole tree. This is not surprising because there are no  
691 samples from Hubei in the a2 clade. We also obtained estimates for a single sampling rate  
692 and a single migration rate from our CNN and CPIs from our calibrated qCNN. Among  
693 the five location-specific estimates of the sampling proportion and the migration proportion  
694 from Nadeau et al. (2021), our CNN's point estimates and interval estimates fall well  
695 within the their combined ranges.

696 The spillover location prediction CNN produced probability estimates of the A2  
697 clade ancestral location the mostly agreed with that of Nadeau and colleagues (Figure 10,  
698 right histograms). The only significant discrepancy in the European origin prediction is  
699 that Nadeau and colleague's analysis suggests a much higher probability that the most  
700 recent common ancestor of the A2 clade was in Hubei than our CNN predicts. This is  
701 likely because our CNN only used the A2 clade to predict A2 origins which has no Hubei

702 samples to infer the origin of the A2 clade while Nadeau et al. (2021) used the whole tree.  
703 Notwithstanding this difference, among European locations, both methods predict  
704 Germany is the most likely location of the most recent common ancestor followed by Italy.

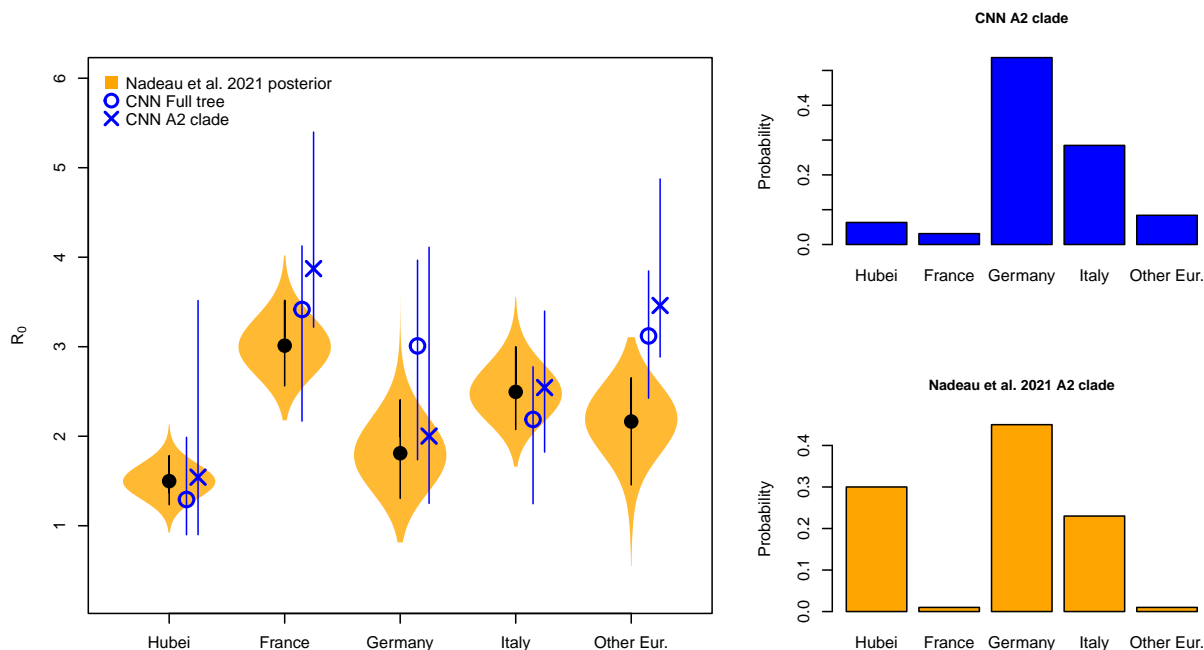

Figure 10: Location-dependent birth-death-sampling model (LDBDS) CNN comparison to (Nadeau et al. 2021) inference. Left violin plots show the posterior distributions of  $R_0$  for each location in Europe as well as Hubei, China (orange). The block dot and line within each violin plot shows the posterior mean and 95% HPI respectively. The blue X and O marks the LDBDS CNN prediction from analyzing the full tree and the A2 (European) clade respectively. Vertical blue lines give the 95% CPI for the CNN estimates of  $R_0$ . Right barplots show the LDBDS CNN prediction (blue) and posterior inference (orange) from (Nadeau et al. 2021) of the ancestral location of the A2 (European) clade (see Figure 1 (Nadeau et al. 2021)).

705

## DISCUSSION AND CONCLUSIONS

706 Inference models are necessarily simplified approximations of the real world. Both  
707 simulation-trained neural networks and likelihood-based inference approaches suffer from  
708 model under-specification and/or misspecification. When comparing inference methods it is

709 important to assess the sensitivity of model inference to simplifying assumptions. In this  
710 study we show that newer deep learning approaches and standard Bayesian approaches  
711 behave and misbehave in similar ways under a panel of phylodynamic estimation tasks  
712 where the inference model is correct as well as when it is misspecified.

713 By extending new approaches to encode phylogenetic trees in a compact data  
714 structure (Voznica et al. 2022; Lambert et al. 2022), we have developed the first application  
715 of phylodynamic deep learning applied to phylogeography with serial sampling. Our  
716 approach is similar to that of Lambert et al. (2022) in which they analyzed a binary SSE  
717 model with exclusively extant sampling. By training a neural network on phylogenetic trees  
718 generated by simulated epidemics, we were able to accurately estimate key epidemiological  
719 parameters, such as the reproduction number and migration rate, in a fraction of the time  
720 it would take with likelihood-based methods. Like Voznica et al. (2022) and Lambert et al.  
721 (2022), we found that CNN estimators perform as well or nearly as well as likelihood-based  
722 estimators under conditions where the inference model is correctly specified to match the  
723 simulation model. The success of these separate applications of deep learning to different  
724 phylodynamic problems is a testament to the versatility of the CBLV encoding of trees.

725 We compared the sensitivity of deep learning and likelihood-based inference to  
726 model misspecification. Because deep-learning methods of phylogenetic and phylodynamic  
727 inference are new, few studies compare how simulation-trained deep learning methods fail  
728 in comparison to likelihood methods in this way (Flagel et al. 2019). We assume that when  
729 the inference model is correctly specified to match the simulation model, the trained CNN  
730 will, at best, produce noisy approximations of likelihood-based parameter estimates. In  
731 reality, issues related to training data set size, learning efficiency, and network overfitting  
732 may cause our CNN-based estimates to contain excess variance or bias when compared to  
733 Bayesian likelihood-based estimators. Our results from five model misspecification  
734 experiments show that both methods of inference perform similarly when the simulating  
735 model and the inference model assumptions do not perfectly match. These similarities

736 exist not only in aggregate, when comparing method performance across datasets, but also  
737 when comparing performance for each individual dataset. This suggests that the CNN and  
738 likelihood methods are truly estimating parameters using isomorphic criteria, despite the  
739 fact that CNN heuristically learns these criteria through data patterns, while likelihood  
740 precisely and mathematically defines these criteria through the model definition itself.

741 Results of comparative sensitivity experiments like this are important because if  
742 likelihood-free methods using deep neural networks can easily be trained to yield estimates  
743 that are as robust to model misspecification as likelihood-based methods, then analysis of a  
744 large space of more complex outbreak scenarios for which tractable likelihood functions are  
745 not available can be developed and applied to real world data. Additionally, sufficiently  
746 realistic, pre-trained neural networks can yield nearly instantaneous inferences from data in  
747 real time to inform analysts and policy makers.

748 We also tested location-dependent SIR simulation trained neural network against a  
749 previous publication fitting a similar model – location-dependent birth-death-sampling  
750 (LDBDS) model – on real-world data using a Bayesian method. Our CNN predicted  
751 location-specific  $R_{0_i}$  and outbreak origin in Europe were similar to that inferred in (Nadeau  
752 et al. 2021). This result and our model misspecification experiments suggest that  
753 simulation-trained deep neural networks trained on phylogenetic trees can find patterns in  
754 the training data that generalize well beyond the training data set.

755 Our study extends the results of Voznica et al. (2022) and Lambert et al. (2022) in  
756 several important ways. Our work showed that the new compact bijective ladderized vector  
757 encoding of phylogenetic trees can easily be extended with one-hot encoding to include  
758 metadata about viral samples. Using this strategy, we trained a neural network to not only  
759 predict important epidemiological parameters such as  $R_{0_i}$  and the sampling rate, but also  
760 geographic parameters such as the migration rate and the location of outbreak origination  
761 or spillover. We anticipate that more diverse and complex metadata can be incorporated to  
762 train neural networks to make predictions about many important aspects of

763 epidemiological spread such as the relative roles of different demographic groups and the  
764 overlap of different species' ranges.

765 This approach can be readily applied to numerous compartment models used to  
766 describe the spread of different pathogens among different species, locations, and  
767 demographic groups, e.g. SEIR, SIRS, SIS, etc. (Ponciano and Capistrán 2011; Volz and  
768 Siveroni 2018; Bjørnstad et al. 2020; Chang et al. 2020; O'Dea and Drake 2021) as well as  
769 modeling super-spreader dynamics as in (Voznica et al. 2022). Here we focused on one  
770 phase of outbreaks (the exponential phase), but there are many other scenarios to be  
771 investigated, such as when the stage of an epidemic differs among locations (e.g.  
772 exponential, peaked, declining). With likelihood-free methods, the link between the  
773 underlying population dynamics from which viral genomes are sampled and inferred  
774 phylogenetic trees can easily be interrogated. More complex models will require larger trees  
775 to infer model parameters. In this study we explored trees that contained fewer than 500  
776 tips, but anticipate that larger trees will demonstrate even greater speed advantages of  
777 neural networks over likelihood-based methods either through subsampling regimes  
778 (Voznica et al. 2022) or by including larger trees in training datasets.

779 With fast, likelihood-free inference afforded by deep learning, the technical  
780 challenges shift from exploring models for which tractable likelihood functions can be  
781 derived towards models that produce realistic empirical data patterns, have parameters  
782 that control variation of those patterns, and are efficient enough to generate large training  
783 data sets. A growing number of advanced simulators are rapidly expanding the possibilities  
784 for deep learning in phylogenetics. For example, FAVITES (Moshiri et al. 2019) is a  
785 simulator of disease spread through large contact networks that tracks transmission trees  
786 and simulates sequence evolution. Gen3sis, MASTER, SLiM, and VGsim are flexible  
787 simulation engines for generating complex ecological, evolutionary, and disease  
788 transmission simulations (Hagen et al. 2021; Vaughan and Drummond 2013; Shchur et al.  
789 2022; Haller and Messer 2019; Overcast et al. 2021). Continued advances in epidemic



790 simulation speed and flexibility will be essential for likelihood-free methods to push the  
791 boundaries of epidemic modeling sophistication and usefulness.

792         There are several avenues of development still needed to realize the potential of  
793 likelihood-free inference in phylogeography using deep learning. The current setup is ideal  
794 for simulation experiments, but it is more difficult to ensure that the optimal parameter  
795 values for empirical data sets are within the range of training data parameters.  
796 Standardizing input tree height, geographical distance, and other parameters help make  
797 training data more universally applicable. Simulation-trained neural networks are often  
798 called amortized methods (Bürkner et al. 2022; Schmitt et al. 2022) because the cost of  
799 inference is front-loaded, *i.e.* it takes time to simulate a training set and train a neural  
800 network. The total cost in time per phylogenetic tree amortizes as the number of trees  
801 analyzed by the trained model increases. These methods are therefore important when a  
802 model is intended to be widely deployed or be responsive to an emerging outbreak where  
803 policy decisions must be formulated rapidly. Because amortized approximate methods  
804 require multiple analyses to realize time savings, researchers need to generate training data  
805 sets over a broad parameter and model space so that trained networks can be applied to  
806 new and diverse data sets.

807         Our analysis introduces a simple approach to estimate the ancestral state  
808 corresponding to the root node or stem node of a phylogeny. More sophisticated supervised  
809 learning approaches will be needed to train neural networks to predict the ancestral  
810 locations for internal nodes other than the root. The topologies and branch lengths of  
811 random phylogenies in the training and test datasets will vary from tree to tree. Our  
812 approach relies on the fact that all trees contain a root node, meaning all trees can help  
813 predict the root node's state. However, few (if any) trees in the training dataset will contain  
814 an arbitrary clade of interest within a test dataset, suggesting to us that naive approaches  
815 to train networks to estimate ancestral states for all internal nodes will probably fail. We  
816 are unaware of any existing solutions for generalized ancestral state estimation using deep



817 learning, and expect the problem will gather more attention as the field matures.

818         Quantifying uncertainty is crucial to data analysis and decision making, and  
819 Bayesian statistics provides a framework for doing so in a rigorous way. It is essential to  
820 understand how uncertainty estimation with likelihood-free methods compare to  
821 likelihood-based methods when confronted with the mismatch of models and real-world  
822 data-generating processes. We quantified uncertainty using conformalized quantile  
823 regression (CQR; Romano et al. 2019) by training neural networks to predict quantiles and  
824 then calibrating those quantiles to produce the expected coverage. We refer to the resulting  
825 intervals as CPI and demonstrate that they predict well the coverage of true values on a  
826 test dataset (Figure 3) and behave in similar ways to Bayesian methods when the model is  
827 or is not misspecified (Figures 2 - 9). Despite having the same (correct) coverage as the  
828 Bayesian HPI, the interval length was 20-50% wider on average making them a more  
829 conservative (less precise) estimation procedure. Though this can likely be improved with  
830 more training data for qCNNs, there are more fundamental challenges for uncertainty  
831 quantification with quantile regression and conformalization.

832         Methods for estimating more precise intervals is an active vein of research among  
833 machine learning researchers and statisticians (Barber et al. 2020; Chung et al. 2021; Sousa  
834 et al. 2022; Gibbs et al. 2023). For example, although intervals estimated by the qCNN are  
835 conditional on each data point, the calibration of quantiles through CQR involves  
836 estimating marginal calibration terms that shift all quantiles by the same amount. If the  
837 error in the quantile coverage is not constant across the prediction range, then a more  
838 adaptive procedure should yeild more precise intervals (Sousa et al. 2022; Gibbs et al.  
839 2023).

840         We also compared the consistency among CPI estimates at different inner-quantiles  
841 to that of HPIs at those same quantiles. We find that independently trained neural  
842 networks for each  $\alpha$  level can potentially lead to inconsistencies where narrower, nested  
843 inner quantiles can have close to or higher coverage than wider quantiles (*e.g.* Figure 9 C).

844 Overall, our results suggest CQR is approximately consistent with likelihood-based  
845 methods and similarly sensitive to model misspecification, while there is room for  
846 improvement. Methods where all quantiles of interest can be estimated jointly (Chung  
847 et al. 2021) may be a fruitful avenue of research for such improvements.

848 Another important challenge of inference with deep learning is the problem of  
849 convergence to a location on the loss function surface that approximates the maximum  
850 likelihood well. There are a number of basic heuristics that can help such as learning  
851 curves but more rigorous methods of ascertaining convergence is the subject of active  
852 research (Bürkner et al. 2022; Schmitt et al. 2022).

853 With recent advances in deep learning in epidemiology, evolution, and ecology  
854 (Battey et al. 2020; Schrider and Kern 2018; Voznica et al. 2022; Radev et al. 2021;  
855 Lambert et al. 2022; Rosenzweig et al. 2022; Suvorov and Schrider 2022) biologists can now  
856 explore the behavior of entire classes of stochastic branching models that are biologically  
857 interesting but mathematically or statistically prohibitive for use with traditional  
858 likelihood-based inference techniques. Beyond epidemiology, we anticipate that deep  
859 learning approaches will be useful for a wide range of currently intractable phylogenetic  
860 modeling problems. Many phylogenetic scenarios – such as the adaptive radiation of anoles  
861 (?) or the global spread of the grasses (?) – involve the evolution of discrete traits,  
862 continuous traits, speciation, and extinction within an ecological or spatial context across a  
863 set of co-evolving species. Deriving fully mechanistic yet tractable phylogenetic model  
864 likelihoods for such complex scenarios is difficult, if not impossible. Careful development  
865 and applications of likelihood-free modeling methods might bring these phylogenetic  
866 scenarios into renewed focus for more detailed study. Although we are cautiously  
867 optimistic about the future of deep learning methods for phylogenetics, it will become  
868 increasingly important for the field to diagnose the conditions where phylogenetic deep  
869 learning underperforms relative to likelihood-based approaches, and to devise general  
870 solutions to benefit the field.

871

## FUNDING

872 This research was supported in part by an appointment to the Department of Defense  
873 (DOD) Research Participation Program administered by the Oak Ridge Institute for  
874 Science and Education (ORISE) through an interagency agreement between the U.S.  
875 Department of Energy (DOE) and the DOD. ORISE is managed by ORAU under DOE  
876 contract number DE-SC0014664. All opinions expressed in this paper are the author's and  
877 do not necessarily reflect the policies and views of DOD, DOE, or ORAU/ORISE. MJL  
878 was supported by the National Science Foundation (DEB 2040347) and by an internal  
879 grant awarded by the Incubator for Transdisciplinary Futures at Washington University.

880

## ACKNOWLEDGEMENTS

881 We are grateful to Jacob McCord, Mark Lowell, Michael May, Fábio Mendes, Sarah  
882 Swiston, Sean McHugh, Walker Sexton, and Mariana Braga for helpful comments on the  
883 research.

884 Data available from the Dryad Digital Repository: <https://doi.org/10.25338/B8SH2J>  
885 (Thompson et al. 2023) and code is available on github:  
886 [https://github.com/ammonthompson/phylogeoe\\_psi\\_cnn](https://github.com/ammonthompson/phylogeoe_psi_cnn)

\*

887

888 References

- 889 Martín Abadi, Ashish Agarwal, Paul Barham, Eugene Brevdo, Zhifeng Chen, Craig Citro,  
890 Greg S. Corrado, Andy Davis, Jeffrey Dean, Matthieu Devin, Sanjay Ghemawat, Ian  
891 Goodfellow, Andrew Harp, Geoffrey Irving, Michael Isard, Yangqing Jia, Rafal  
892 Jozefowicz, Lukasz Kaiser, Manjunath Kudlur, Josh Levenberg, Dan Mane, Rajat  
893 Monga, Sherry Moore, Derek Murray, Chris Olah, Mike Schuster, Jonathon Shlens,  
894 Benoit Steiner, Ilya Sutskever, Kunal Talwar, Paul Tucker, Vincent Vanhoucke, Vijay  
895 Vasudevan, Fernanda Viegas, Oriol Vinyals, Pete Warden, Martin Wattenberg, Martin  
896 Wicke, Yuan Yu, and Xiaoqiang Zheng. TensorFlow: Large-Scale Machine Learning on  
897 Heterogeneous Distributed Systems, March 2016.
- 898 Laith Alzubaidi, Jinglan Zhang, Amjad J. Humaidi, Ayad Al-Dujaili, Ye Duan, Omran  
899 Al-Shamma, J. Santamaría, Mohammed A. Fadhel, Muthana Al-Amidie, and Laith  
900 Farhan. Review of deep learning: Concepts, CNN architectures, challenges, applications,  
901 future directions. *Journal of Big Data*, 8(1):53, 2021. ISSN 2196-1115. doi:  
902 10.1186/s40537-021-00444-8.
- 903 Roy M Anderson and Robert M May. Population biology of infectious diseases: Part i.  
904 *Nature*, 280(5721):361–367, 1979.
- 905 Anastasios N. Angelopoulos, Stephen Bates, Clara Fannjiang, Michael I. Jordan, and  
906 Tijana Zrnic. Prediction-Powered Inference, February 2023.
- 907 Rina Foygel Barber, Emmanuel J. Candès, Aaditya Ramdas, and Ryan J. Tibshirani. The  
908 limits of distribution-free conditional predictive inference, April 2020.
- 909 CJ Battey, Peter L Ralph, and Andrew D Kern. Predicting geographic location from  
910 genetic variation with deep neural networks. *eLife*, 9:e54507, June 2020. ISSN  
911 2050-084X. doi: 10.7554/eLife.54507.

- 912 Jeremy M. Beaulieu and Brian C. O’Meara. Detecting Hidden Diversification Shifts in  
913 Models of Trait-Dependent Speciation and Extinction. *Systematic Biology*, 65(4):  
914 583–601, July 2016. ISSN 1063-5157, 1076-836X. doi: 10.1093/sysbio/syw022.
- 915 Ottar N. Bjørnstad, Katriona Shea, Martin Krzywinski, and Naomi Altman. The SEIRS  
916 model for infectious disease dynamics. *Nature Methods*, 17(6):557–558, June 2020. ISSN  
917 1548-7091, 1548-7105. doi: 10.1038/s41592-020-0856-2.
- 918 Folmer Bokma. Artificial neural networks can learn to estimate extinction rates from  
919 molecular phylogenies. *Journal of theoretical biology*, 243(3):449–454, 2006.
- 920 Remco Bouckaert, Timothy G. Vaughan, Joëlle Barido-Sottani, Sebastián Duchêne,  
921 Mathieu Fourment, Alexandra Gavryushkina, Joseph Heled, Graham Jones, Denise  
922 Kühnert, Nicola De Maio, Michael Matschiner, Fábio K. Mendes, Nicola F. Müller,  
923 Huw A. Ogilvie, Louis du Plessis, Alex Poppinga, Andrew Rambaut, David Rasmussen,  
924 Igor Siveroni, Marc A. Suchard, Chieh-Hsi Wu, Dong Xie, Chi Zhang, Tanja Stadler, and  
925 Alexei J. Drummond. BEAST 2.5: An advanced software platform for Bayesian  
926 evolutionary analysis. *PLOS Computational Biology*, 15(4):e1006650, April 2019. ISSN  
927 1553-7358. doi: 10.1371/journal.pcbi.1006650.
- 928 Paul-Christian Bürkner, Maximilian Scholz, and Stefan Radev. Some models are useful,  
929 but how do we know which ones? Towards a unified Bayesian model taxonomy,  
930 September 2022.
- 931 Sheryl L. Chang, Mahendra Piraveenan, Philippa Pattison, and Mikhail Prokopenko.  
932 Game theoretic modelling of infectious disease dynamics and intervention methods: A  
933 review. *Journal of Biological Dynamics*, 14(1):57–89, January 2020. ISSN 1751-3758,  
934 1751-3766. doi: 10.1080/17513758.2020.1720322.
- 935 F. K. Chollet. Keras: The Python deep learning API. <https://keras.io/>.

936 Youngseog Chung, Willie Neiswanger, Ian Char, and Jeff Schneider. Beyond Pinball Loss:  
937 Quantile Methods for Calibrated Uncertainty Quantification, December 2021.

938 Kyle Cranmer, Johann Brehmer, and Gilles Louppe. The frontier of simulation-based  
939 inference. *Proceedings of the National Academy of Sciences*, 117(48):30055–30062,  
940 December 2020. ISSN 0027-8424, 1091-6490. doi: 10.1073/pnas.1912789117.

941 Emanuel Masiero da Fonseca, Guarino R. Colli, Fernanda P. Werneck, and Bryan C.  
942 Carstens. Phylogeographic model selection using convolutional neural networks,  
943 September 2020.

944 Jordan Douglas, Fábio K Mendes, Remco Bouckaert, Dong Xie, Cinthy L Jiménez-Silva,  
945 Christiaan Swanepoel, Joep de Ligt, Xiaoyun Ren, Matt Storey, James Hadfield, Colin R  
946 Simpson, Jemma L Geoghegan, Alexei J Drummond, and David Welch. Phylodynamics  
947 reveals the role of human travel and contact tracing in controlling the first wave of  
948 COVID-19 in four island nations. *Virus Evolution*, 7(2), September 2021. ISSN  
949 2057-1577. doi: 10.1093/ve/veab052.

950 Richard G. FitzJohn. Diversitree: Comparative phylogenetic analyses of diversification in  
951 R. *Methods in Ecology and Evolution*, 3(6):1084–1092, 2012. ISSN 2041-210X. doi:  
952 10.1111/j.2041-210X.2012.00234.x.

953 Lex Flagel, Yaniv Brandvain, and Daniel R Schrider. The Unreasonable Effectiveness of  
954 Convolutional Neural Networks in Population Genetic Inference. *Molecular Biology and*  
955 *Evolution*, 36(2):220–238, February 2019. ISSN 0737-4038, 1537-1719. doi:  
956 10.1093/molbev/msy224.

957 Jiansi Gao, Michael R May, Bruce Rannala, and Brian R Moore. New Phylogenetic Models  
958 Incorporating Interval-Specific Dispersal Dynamics Improve Inference of Disease Spread.  
959 *Molecular Biology and Evolution*, 39(8):msac159, August 2022. ISSN 1537-1719. doi:  
960 10.1093/molbev/msac159.

961 Jiansi Gao, Michael R. May, Bruce Rannala, and Brian R. Moore. Model misspecification  
962 misleads inference of the spatial dynamics of disease outbreaks. *Proceedings of the*  
963 *National Academy of Sciences*, 120(11):e2213913120, March 2023. doi:  
964 10.1073/pnas.2213913120.

965 Isaac Gibbs, John J. Cherian, and Emmanuel J. Candès. Conformal Prediction With  
966 Conditional Guarantees, May 2023.

967 James Hadfield, Colin Megill, Sidney M Bell, John Huddleston, Barney Potter, Charlton  
968 Callender, Pavel Sagulenko, Trevor Bedford, and Richard A Neher. Nextstrain: real-time  
969 tracking of pathogen evolution. *Bioinformatics*, 34(23):4121–4123, December 2018. ISSN  
970 1367-4803. doi: 10.1093/bioinformatics/bty407. URL  
971 <https://doi.org/10.1093/bioinformatics/bty407>.

972 Oskar Hagen, Benjamin Flück, Fabian Fopp, Juliano S. Cabral, Florian Hartig, Mikael  
973 Pontarp, Thiago F. Rangel, and Loïc Pellissier. Gen3sis: A general engine for  
974 eco-evolutionary simulations of the processes that shape Earth’s biodiversity. *PLOS*  
975 *Biology*, 19(7):e3001340, July 2021. ISSN 1545-7885. doi: 10.1371/journal.pbio.3001340.

976 Benjamin C Haller and Philipp W Messer. SLiM 3: Forward Genetic Simulations Beyond  
977 the Wright–Fisher Model. *Molecular Biology and Evolution*, 36(3):632–637, March 2019.  
978 ISSN 0737-4038. doi: 10.1093/molbev/msy228.

979 Sebastian Höhna, Michael J. Landis, Tracy A. Heath, Bastien Boussau, Nicolas Lartillot,  
980 Brian R. Moore, John P. Huelsenbeck, and Fredrik Ronquist. RevBayes: Bayesian  
981 Phylogenetic Inference Using Graphical Models and an Interactive Model-Specification  
982 Language. *Systematic Biology*, 65(4):726–736, July 2016. ISSN 1063-5157, 1076-836X.  
983 doi: 10.1093/sysbio/syw021.

984 Eddie C Holmes and Geoff P Garnett. Genes, trees and infections: molecular evidence in  
985 epidemiology. *Trends in Ecology & Evolution*, 9(7):256–260, 1994.

- 986 Eddie C Holmes, Sean Nee, Andrew Rambaut, Geoff P Garnett, and Paul H Harvey.  
987 Revealing the history of infectious disease epidemics through phylogenetic trees.  
988 *Philosophical Transactions of the Royal Society of London. Series B: Biological Sciences*,  
989 349(1327):33–40, 1995.
- 990 Asifullah Khan, Anabia Sohail, Umme Zahoora, and Aqsa Saeed Qureshi. A survey of the  
991 recent architectures of deep convolutional neural networks. *Artificial Intelligence Review*,  
992 53(8):5455–5516, December 2020. ISSN 1573-7462. doi: 10.1007/s10462-020-09825-6.
- 993 Diederik P. Kingma and Jimmy Ba. Adam: A Method for Stochastic Optimization,  
994 January 2017.
- 995 Denise Kühnert, Tanja Stadler, Timothy G. Vaughan, and Alexei J. Drummond.  
996 Simultaneous reconstruction of evolutionary history and epidemiological dynamics from  
997 viral sequences with the birth–death SIR model. *Journal of The Royal Society Interface*,  
998 11(94):20131106, May 2014. ISSN 1742-5689, 1742-5662. doi: 10.1098/rsif.2013.1106.
- 999 Denise Kühnert, Tanja Stadler, Timothy G. Vaughan, and Alexei J. Drummond.  
1000 Phylodynamics with Migration: A Computational Framework to Quantify Population  
1001 Structure from Genomic Data. *Molecular Biology and Evolution*, 33(8):2102–2116,  
1002 August 2016. ISSN 0737-4038. doi: 10.1093/molbev/msw064.
- 1003 Sophia Lambert, Jakub Voznica, and H el ene Morlon. Deep Learning from Phylogenies for  
1004 Diversification Analyses, September 2022.
- 1005 Jing Lei, Max G’Sell, Alessandro Rinaldo, Ryan J. Tibshirani, and Larry Wasserman.  
1006 Distribution-Free Predictive Inference for Regression. *Journal of the American Statistical*  
1007 *Association*, 113(523):1094–1111, July 2018. ISSN 0162-1459. doi:  
1008 10.1080/01621459.2017.1307116.
- 1009 Philippe Lemey, Andrew Rambaut, Alexei J. Drummond, and Marc A. Suchard. Bayesian



- 1010 Phylogeography Finds Its Roots. *PLoS Computational Biology*, 5(9):e1000520,  
1011 September 2009. ISSN 1553-7358. doi: 10.1371/journal.pcbi.1000520.
- 1012 Philippe Lemey, Nick Ruktanonchai, Samuel L. Hong, Vittoria Colizza, Chiara Poletto,  
1013 Frederik Van den Broeck, Mandev S. Gill, Xiang Ji, Anthony Levasseur, Bas B.  
1014 Oude Munnink, Marion Koopmans, Adam Sadilek, Shengjie Lai, Andrew J. Tatem, Guy  
1015 Baele, Marc A. Suchard, and Simon Dellicour. Untangling introductions and persistence  
1016 in COVID-19 resurgence in Europe. *Nature*, June 2021. ISSN 0028-0836, 1476-4687. doi:  
1017 10.1038/s41586-021-03754-2.
- 1018 Frédéric Lemoine and Olivier Gascuel. Gotree/Goalign: Toolkit and Go API to facilitate  
1019 the development of phylogenetic workflows. *NAR Genomics and Bioinformatics*, 3(3):  
1020 lqab075, September 2021. ISSN 2631-9268. doi: 10.1093/nargab/lqab075.
- 1021 Wayne P. Maddison, Peter E. Midford, and Sarah P. Otto. Estimating a Binary  
1022 Character’s Effect on Speciation and Extinction. *Systematic Biology*, 56(5):701–710,  
1023 October 2007. ISSN 1076-836X, 1063-5157. doi: 10.1080/10635150701607033.
- 1024 Mike Meredith and John Kruschke. Bayesian Estimation Supersedes the t-Test. page 13.
- 1025 Bui Quang Minh, Heiko A Schmidt, Olga Chernomor, Dominik Schrempf, Michael D  
1026 Woodhams, Arndt von Haeseler, and Robert Lanfear. IQ-TREE 2: New Models and  
1027 Efficient Methods for Phylogenetic Inference in the Genomic Era. *Molecular Biology and*  
1028 *Evolution*, 37(5):1530–1534, May 2020. ISSN 0737-4038. doi: 10.1093/molbev/msaa015.
- 1029 Niema Moshiri, Manon Ragonnet-Cronin, Joel O Wertheim, and Siavash Mirarab.  
1030 FAVITES: Simultaneous simulation of transmission networks, phylogenetic trees and  
1031 sequences. *Bioinformatics*, 35(11):1852–1861, June 2019. ISSN 1367-4803, 1460-2059.  
1032 doi: 10.1093/bioinformatics/bty921.
- 1033 Sarah A. Nadeau, Timothy G. Vaughan, Jérémie Scire, Jana S. Huisman, and Tanja  
1034 Stadler. The origin and early spread of SARS-CoV-2 in Europe. *Proceedings of the*

- 1035 *National Academy of Sciences*, 118(9):e2012008118, March 2021. ISSN 0027-8424,  
1036 1091-6490. doi: 10.1073/pnas.2012008118.
- 1037 Luca Nesterenko, Bastien Boussau, and Laurent Jacob. Phyloformer: Towards fast and  
1038 accurate phylogeny estimation with self-attention networks, June 2022.
- 1039 Eamon B O’Dea and John M Drake. A semi-parametric, state-space compartmental model  
1040 with time-dependent parameters for forecasting COVID-19 cases, hospitalizations, and  
1041 deaths. page 32, 2021.
- 1042 Isaac Overcast, Megan Ruffley, James Rosindell, Luke Harmon, Paulo AV Borges, Brent C  
1043 Emerson, Rampal S Etienne, Rosemary Gillespie, Henrik Krehenwinkel, D Luke Mahler,  
1044 et al. A unified model of species abundance, genetic diversity, and functional diversity  
1045 reveals the mechanisms structuring ecological communities. *Molecular Ecology*  
1046 *Resources*, 21(8):2782–2800, 2021.
- 1047 Jonathan E. Pekar, Andrew Magee, Edyth Parker, Niema Moshiri, Katherine Izhikevich,  
1048 Jennifer L. Havens, Karthik Gangavarapu, Lorena Mariana Malpica Serrano, Alexander  
1049 Crits-Christoph, Nathaniel L. Matteson, Mark Zeller, Joshua I. Levy, Jade C. Wang,  
1050 Scott Hughes, Jungmin Lee, Heedo Park, Man-Seong Park, Katherine Zi Yan Ching,  
1051 Raymond Tzer Pin Lin, Mohd Noor Mat Isa, Yusuf Muhammad Noor, Tetyana I.  
1052 Vasylyeva, Robert F. Garry, Edward C. Holmes, Andrew Rambaut, Marc A. Suchard,  
1053 Kristian G. Andersen, Michael Worobey, and Joel O. Wertheim. The molecular  
1054 epidemiology of multiple zoonotic origins of SARS-CoV-2. *Science*, 0(0):eabp8337, July  
1055 2022. doi: 10.1126/science.abp8337.
- 1056 José M. Ponciano and Marcos A. Capistrán. First Principles Modeling of Nonlinear  
1057 Incidence Rates in Seasonal Epidemics. *PLOS Computational Biology*, 7(2):e1001079,  
1058 February 2011. ISSN 1553-7358. doi: 10.1371/journal.pcbi.1001079.
- 1059 O. G. Pybus, M. A. Suchard, P. Lemey, F. J. Bernardin, A. Rambaut, F. W. Crawford,

- 1060 R. R. Gray, N. Arinaminpathy, S. L. Stramer, M. P. Busch, and E. L. Delwart. Unifying  
1061 the spatial epidemiology and molecular evolution of emerging epidemics. *Proceedings of*  
1062 *the National Academy of Sciences*, 109(37):15066–15071, September 2012. ISSN  
1063 0027-8424, 1091-6490. doi: 10.1073/pnas.1206598109.
- 1064 Stefan T. Radev, Frederik Graw, Simiao Chen, Nico T. Mutters, Vanessa M. Eichel, Till  
1065 Bärnighausen, and Ullrich Köthe. OutbreakFlow: Model-based Bayesian inference of  
1066 disease outbreak dynamics with invertible neural networks and its application to the  
1067 COVID-19 pandemics in Germany. *PLOS Computational Biology*, 17(10):e1009472,  
1068 October 2021. ISSN 1553-7358. doi: 10.1371/journal.pcbi.1009472.
- 1069 A. Rambaut and N. C. Grassly. Seq-Gen: an application for the Monte Carlo simulation of  
1070 DNA sequence evolution along phylogenetic trees. *Computer Applications in the*  
1071 *Biosciences*, 13:235–238, 1997.
- 1072 Andrew Rambaut, Oliver G Pybus, Martha I Nelson, Cecile Viboud, Jeffery K  
1073 Taubenberger, and Edward C Holmes. The genomic and epidemiological dynamics of  
1074 human influenza a virus. *Nature*, 453(7195):615–619, 2008.
- 1075 Liam J. Revell. Phytools: An R package for phylogenetic comparative biology (and other  
1076 things). *Methods in Ecology and Evolution*, 3(2):217–223, 2012. ISSN 2041-210X. doi:  
1077 10.1111/j.2041-210X.2011.00169.x.
- 1078 Francisco Richter, Bart Haegeman, Rampal S. Etienne, and Ernst C. Wit. Introducing a  
1079 general class of species diversification models for phylogenetic trees. *Statistica*  
1080 *Neerlandica*, 74(3):261–274, 2020. ISSN 1467-9574. doi: 10.1111/stan.12205.
- 1081 Yaniv Romano, Evan Patterson, and Emmanuel Candes. Conformalized Quantile  
1082 Regression. In *Advances in Neural Information Processing Systems*, volume 32. Curran  
1083 Associates, Inc., 2019.

- 1084 Benjamin K. Rosenzweig, Matthew W. Hahn, and Andrew Kern. Accurate Detection of  
1085 Incomplete Lineage Sorting via Supervised Machine Learning, November 2022.
- 1086 Marvin Schmitt, Paul-Christian Bürkner, Ullrich Köthe, and Stefan T. Radev. Detecting  
1087 Model Misspecification in Amortized Bayesian Inference with Neural Networks, May  
1088 2022.
- 1089 Daniel R. Schrider and Andrew D. Kern. Supervised Machine Learning for Population  
1090 Genetics: A New Paradigm. *Trends in Genetics*, 34(4):301–312, April 2018. ISSN  
1091 01689525. doi: 10.1016/j.tig.2017.12.005.
- 1092 Jérémie Scire, Joëlle Barido-Sottani, Denise Kühnert, Timothy G. Vaughan, and Tanja  
1093 Stadler. Improved multi-type birth-death phylodynamic inference in BEAST 2. Preprint,  
1094 *Evolutionary Biology*, January 2020.
- 1095 Vladimir Shchur, Vadim Spirin, Dmitry Sirotkin, Evgeni Burovski, Nicola De Maio, and  
1096 Russell Corbett-Detig. VGsim: Scalable viral genealogy simulator for global pandemic.  
1097 *PLOS Computational Biology*, 18(8):e1010409, August 2022. ISSN 1553-7358. doi:  
1098 10.1371/journal.pcbi.1010409.
- 1099 Claudia Solis-Lemus, Shengwen Yang, and Leonardo Zepeda-Nunez. Accurate Phylogenetic  
1100 Inference with a Symmetry-preserving Neural Network Model, January 2022.
- 1101 Martim Sousa, Ana Maria Tomé, and José Moreira. Improved conformalized quantile  
1102 regression, November 2022.
- 1103 Tanja Stadler. Sampling-through-time in birth–death trees. *Journal of Theoretical Biology*,  
1104 267(3):396–404, December 2010. ISSN 00225193. doi: 10.1016/j.jtbi.2010.09.010.
- 1105 Tanja Stadler, Roger Kouyos, Viktor von Wyl, Sabine Yerly, Jürg Böni, Philippe Bürgisser,  
1106 Thomas Klimkait, Beda Joos, Philip Rieder, Dong Xie, Huldrych F. Günthard, Alexei J.  
1107 Drummond, Sebastian Bonhoeffer, and the Swiss HIV Cohort Study. Estimating the

- 1108 Basic Reproductive Number from Viral Sequence Data. *Molecular Biology and Evolution*,  
1109 29(1):347–357, January 2012. ISSN 1537-1719, 0737-4038. doi: 10.1093/molbev/msr217.
- 1110 Ingo Steinwart and Andreas Christmann. Estimating conditional quantiles with the help of  
1111 the pinball loss. *Bernoulli*, 17(1):211–225, February 2011. ISSN 1350-7265. doi:  
1112 10.3150/10-BEJ267.
- 1113 Anton Suvorov and Daniel R. Schrider. Reliable estimation of tree branch lengths using  
1114 deep neural networks. *bioRxiv*, 2022. doi: 10.1101/2022.11.07.515518. URL  
1115 <https://www.biorxiv.org/content/early/2023/02/21/2022.11.07.515518>.
- 1116 Anton Suvorov, Joshua Hochuli, and Daniel R Schrider. Accurate Inference of Tree  
1117 Topologies from Multiple Sequence Alignments Using Deep Learning. *Systematic Biology*,  
1118 69(2):221–233, March 2020. ISSN 1063-5157, 1076-836X. doi: 10.1093/sysbio/syz060.
- 1119 Ammon Thompson, Benjamin Liebeskind, Erik J. Scully, and Michael J. Landis. Deep  
1120 learning phylogeography. *Dryad*, 2023. doi: 10.25338/B8SH2J.
- 1121 Timothy G. Vaughan and Alexei J. Drummond. A Stochastic Simulator of Birth–Death  
1122 Master Equations with Application to Phylodynamics. *Molecular Biology and Evolution*,  
1123 30(6):1480–1493, June 2013. ISSN 0737-4038. doi: 10.1093/molbev/mst057.
- 1124 Timothy G. Vaughan, Denise Kühnert, Alex Poppinga, David Welch, and Alexei J.  
1125 Drummond. Efficient Bayesian inference under the structured coalescent.  
1126 *Bioinformatics*, 30(16):2272–2279, August 2014. ISSN 1367-4803, 1460-2059. doi:  
1127 10.1093/bioinformatics/btu201.
- 1128 Erik M. Volz and Igor Siveroni. Bayesian phylodynamic inference with complex models.  
1129 *PLOS Computational Biology*, 14(11):e1006546, November 2018. ISSN 1553-7358. doi:  
1130 10.1371/journal.pcbi.1006546.

- 1131 Erik M. Volz, Katia Koelle, and Trevor Bedford. Viral Phylodynamics. *PLOS*  
1132 *Computational Biology*, 9(3):e1002947, March 2013. ISSN 1553-7358. doi:  
1133 10.1371/journal.pcbi.1002947. URL <https://journals.plos.org/ploscompbiol/article?id=10.1371/journal.pcbi.1002947>.  
1134 //journals.plos.org/ploscompbiol/article?id=10.1371/journal.pcbi.1002947.  
1135 Publisher: Public Library of Science.
- 1136 Vladimir Vovk, Alexander Gammerman, and Glenn Shafer. Conformal Prediction: General  
1137 Case and Regression. In Vladimir Vovk, Alexander Gammerman, and Glenn Shafer,  
1138 editors, *Algorithmic Learning in a Random World*, pages 19–69. Springer International  
1139 Publishing, Cham, 2022. ISBN 978-3-031-06649-8. doi: 10.1007/978-3-031-06649-8\_2.
- 1140 J. Voznica, A. Zhukova, V. Boskova, E. Saulnier, F. Lemoine, M. Moslonka-Lefebvre, and  
1141 O. Gascuel. Deep learning from phylogenies to uncover the epidemiological dynamics of  
1142 outbreaks. *Nature Communications*, 13(1):3896, July 2022. ISSN 2041-1723. doi:  
1143 10.1038/s41467-022-31511-0.
- 1144 Nicole L. Washington, Karthik Gangavarapu, Mark Zeller, Alexandre Bolze, Elizabeth T.  
1145 Cirulli, Kelly M. Schiabor Barrett, Brendan B. Larsen, Catelyn Anderson, Simon White,  
1146 Tyler Cassens, Sharoni Jacobs, Geraint Levan, Jason Nguyen, Jimmy M. Ramirez,  
1147 Charlotte Rivera-Garcia, Efren Sandoval, Xueqing Wang, David Wong, Emily Spencer,  
1148 Refugio Robles-Sikisaka, Ezra Kurzban, Laura D. Hughes, Xianding Deng, Candace  
1149 Wang, Venice Servellita, Holly Valentine, Peter De Hoff, Phoebe Seaver, Shashank Sathe,  
1150 Kimberly Gietzen, Brad Sickler, Jay Antico, Kelly Hoon, Jingtao Liu, Aaron Harding,  
1151 Omid Bakhtar, Tracy Basler, Brett Austin, Duncan MacCannell, Magnus Isaksson,  
1152 Phillip G. Febbo, David Becker, Marc Laurent, Eric McDonald, Gene W. Yeo, Rob  
1153 Knight, Louise C. Laurent, Eileen de Feo, Michael Worobey, Charles Y. Chiu, Marc A.  
1154 Suchard, James T. Lu, William Lee, and Kristian G. Andersen. Emergence and rapid  
1155 transmission of SARS-CoV-2 B.1.1.7 in the United States. *Cell*, 184(10):2587–2594.e7,  
1156 May 2021. ISSN 00928674. doi: 10.1016/j.cell.2021.03.052.

1157 Michael Worobey, Thomas D Watts, Richard A McKay, Marc A Suchard, Timothy  
1158 Granade, Dirk E Teuwen, Beryl A Koblin, Walid Heneine, Philippe Lemey, and  
1159 Harold W Jaffe. 1970s and ‘patient 0’ hiv-1 genomes illuminate early hiv/aids history in  
1160 north america. *Nature*, 539(7627):98–101, 2016.

1161 Michael Worobey, Jonathan Pekar, Brendan B. Larsen, Martha I. Nelson, Verity Hill,  
1162 Jeffrey B. Joy, Andrew Rambaut, Marc A. Suchard, Joel O. Wertheim, and Philippe  
1163 Lemey. The emergence of SARS-CoV-2 in Europe and North America. *Science*, 370  
1164 (6516):564–570, October 2020. ISSN 0036-8075, 1095-9203. doi: 10.1126/science.abc8169.

1165

## SUPPLEMENTAL TABLES

Table S1: BEST comparisons between CNN and Bayesian absolute percent errors (APEs) for model parameters across all experiments.

| 95%HPD intervals of average relative error from BEST analysis     |                             |                                               |                              |
|-------------------------------------------------------------------|-----------------------------|-----------------------------------------------|------------------------------|
| True inference model (Reference for misspecification experiments) | CNN APE                     | Posterior mean APE                            | CNN APE - Posterior mean APE |
| $R_0$                                                             | 2.4, 3.5                    | 2.1, 3.1                                      | 0.1, 1.2                     |
| $\delta$                                                          | 7.0, 10.5                   | 5.7, 8.9                                      | 0.2, 3.0                     |
| m                                                                 | 9.5, 14.1                   | 8.4, 12.1                                     | 0.4, 3.2                     |
| <b>Misspecified <math>R_0</math> experiment</b>                   |                             |                                               |                              |
|                                                                   | CNN APE - CNN Reference APE | Posterior mean APE - Post. mean Reference APE | CNN APE - Posterior mean APE |
| $R_0$                                                             | 11.8, 17.8                  | 11.0, 16.9                                    | -0.1, 1.6                    |
| $\delta$                                                          | 0.8, 7.6                    | -0.6, 5.3                                     | 1.3, 5.8                     |
| m                                                                 | 8.2, 17.9                   | 6.5, 15.9                                     | 1.3, 4.7                     |
| <b>Misspecified sample rate experiment</b>                        |                             |                                               |                              |
|                                                                   | CNN APE - CNN Reference APE | Posterior mean APE - Post. mean Reference APE | CNN APE - Posterior mean APE |
| $R_0$                                                             | -0.3, 1.7                   | 0.03, 1.7                                     | 0.1, 1.3                     |
| $\delta$                                                          | 12.0, 21.2                  | 12.6, 21.4                                    | 0.1, 4.0                     |
| m                                                                 | 3.3, 12.0                   | 5.6, 14.4                                     | -1.2, 2.7                    |
| <b>Misspecified migration rate experiment</b>                     |                             |                                               |                              |
|                                                                   | CNN APE - CNN Reference APE | Posterior mean APE - Post. mean Reference APE | CNN APE - Posterior mean APE |
| $R_0$                                                             | -0.9, 0.8                   | -0.6, 1.0                                     | -0.5, 0.8                    |
| $\delta$                                                          | -2.3, 3.3                   | 0.1, 5.8                                      | -1.4, 2.3                    |
| m                                                                 | 4.0, 15.2                   | 5.0, 16.2                                     | -1.3, 2.6                    |
| <b>Misspecified number of locations experiment</b>                |                             |                                               |                              |
|                                                                   | CNN APE - CNN Reference APE | Posterior mean APE - Post. mean Reference APE | CNN APE - Posterior mean APE |
| $R_0$                                                             | -0.3, 1.5                   | -0.7, 0.8                                     | 0.5, 1.9                     |
| $\delta$                                                          | -0.3, 4.9                   | -0.5, 4.2                                     | 0.4, 3.5                     |
| m                                                                 | 3.4, 11.1                   | 5.8, 13.5                                     | -0.9, 1.6                    |
| <b>Phylogenetic error experiment</b>                              |                             |                                               |                              |
|                                                                   | CNN APE - CNN Reference APE | Posterior mean APE - Post. mean Reference APE | CNN APE - Posterior mean APE |
| $R_0$                                                             | 0.7, 3.0                    | 1.7, 4.4                                      | -1.4, 0.1                    |
| $\delta$                                                          | 2.3, 9.6                    | 1.5, 7.2                                      | 1.4, 5.3                     |
| m                                                                 | -1.2, 6.0                   | -1.8, 5.4                                     | -1.7, 2.4                    |



Table S2: Comparison 95% CPI and HPI for all experiments.

| Coverage, width, and overlap of 95% Intervals | $R_0$   |           |                            |                    | $\delta$ |           |                            |                    | $m$     |           |                            |                    |
|-----------------------------------------------|---------|-----------|----------------------------|--------------------|----------|-----------|----------------------------|--------------------|---------|-----------|----------------------------|--------------------|
|                                               | CNN CPI | Bayes HPI | Mean CPI width / HPI width | Mean Jaccard index | CNN CPI  | Bayes HPI | Mean CPI width / HPI width | Mean Jaccard index | CNN CPI | Bayes HPI | Mean CPI width / HPI width | Mean Jaccard index |
| True model                                    | 0.95    | 0.96      | 1.4                        | 0.67               | 0.96     | 0.94      | 1.4                        | 0.66               | 0.94    | 0.95      | 1.2                        | 0.75               |
| Misspecified $R_0$                            | 0.44    | 0.29      | 1.5                        | 0.63               | 0.9      | 0.90      | 1.5                        | 0.63               | 0.74    | 0.67      | 1.2                        | 0.76               |
| Misspecified $\delta$                         | 0.95    | 0.96      | 1.4                        | 0.67               | 0.71     | 0.55      | 1.3                        | 0.69               | 0.72    | 0.75      | 1.2                        | 0.75               |
| Misspecified $m$                              | 0.93    | 0.94      | 1.5                        | 0.63               | 0.94     | 0.96      | 1.5                        | 0.65               | 0.73    | 0.69      | 1.3                        | 0.73               |
| Misspecified. Number of locations             | 0.93    | 0.92      | 1.4                        | 0.65               | 0.96     | 0.96      | 1.4                        | 0.68               | 0.82    | 0.80      | 1.2                        | 0.76               |
| Phylogenetic error                            | 0.79    | 0.60      | 1.4                        | 0.59               | 0.71     | 0.81      | 1.3                        | 0.59               | 0.87    | 0.83      | 1.3                        | 0.71               |

1166

## SUPPLEMENTAL FIGURES

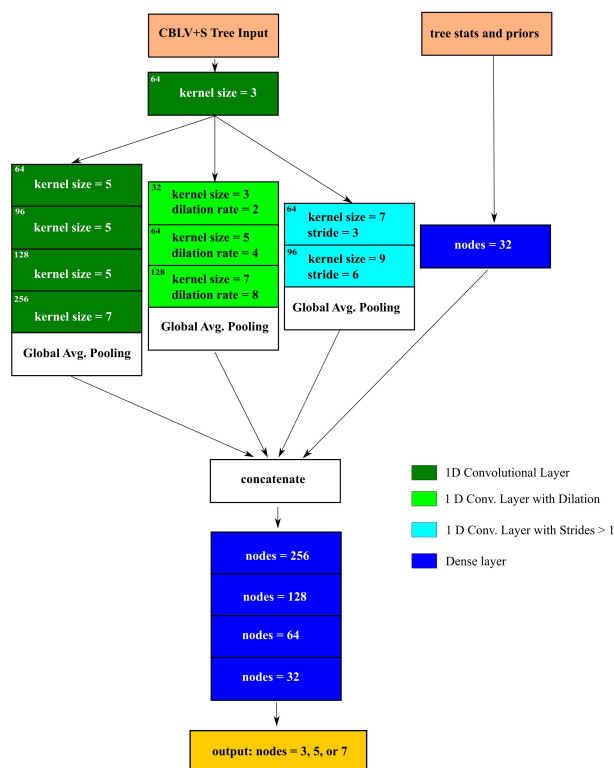

Figure S1: Diagram of deep neural network trained to make 2 kinds of predictions (rates and origin location) under two models (LIBDS and LDBDS).

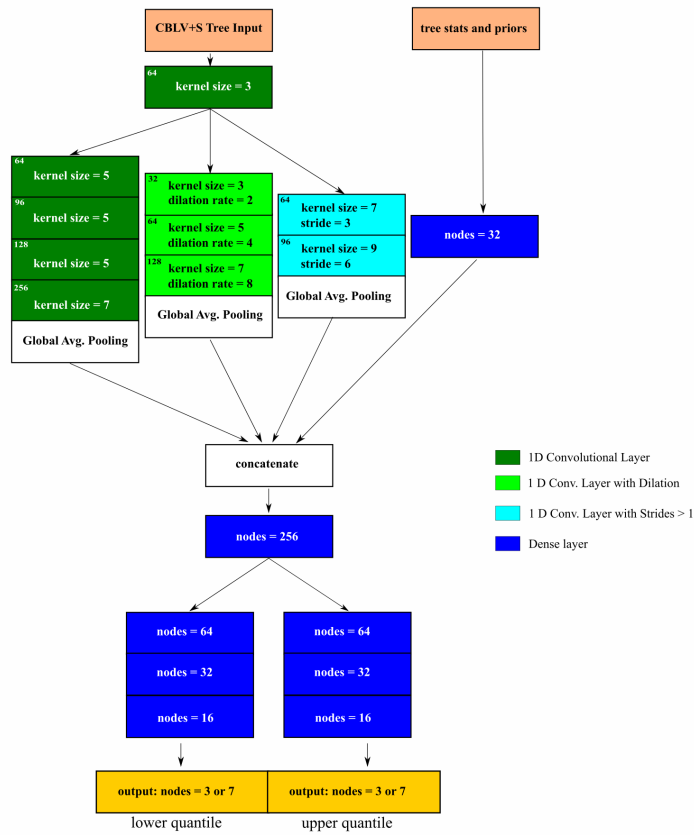

Figure S2: Diagram of deep neural network trained to predict the upper and lower quantiles for a specified  $\alpha$  level under two models (LIBDS and LDBDS).

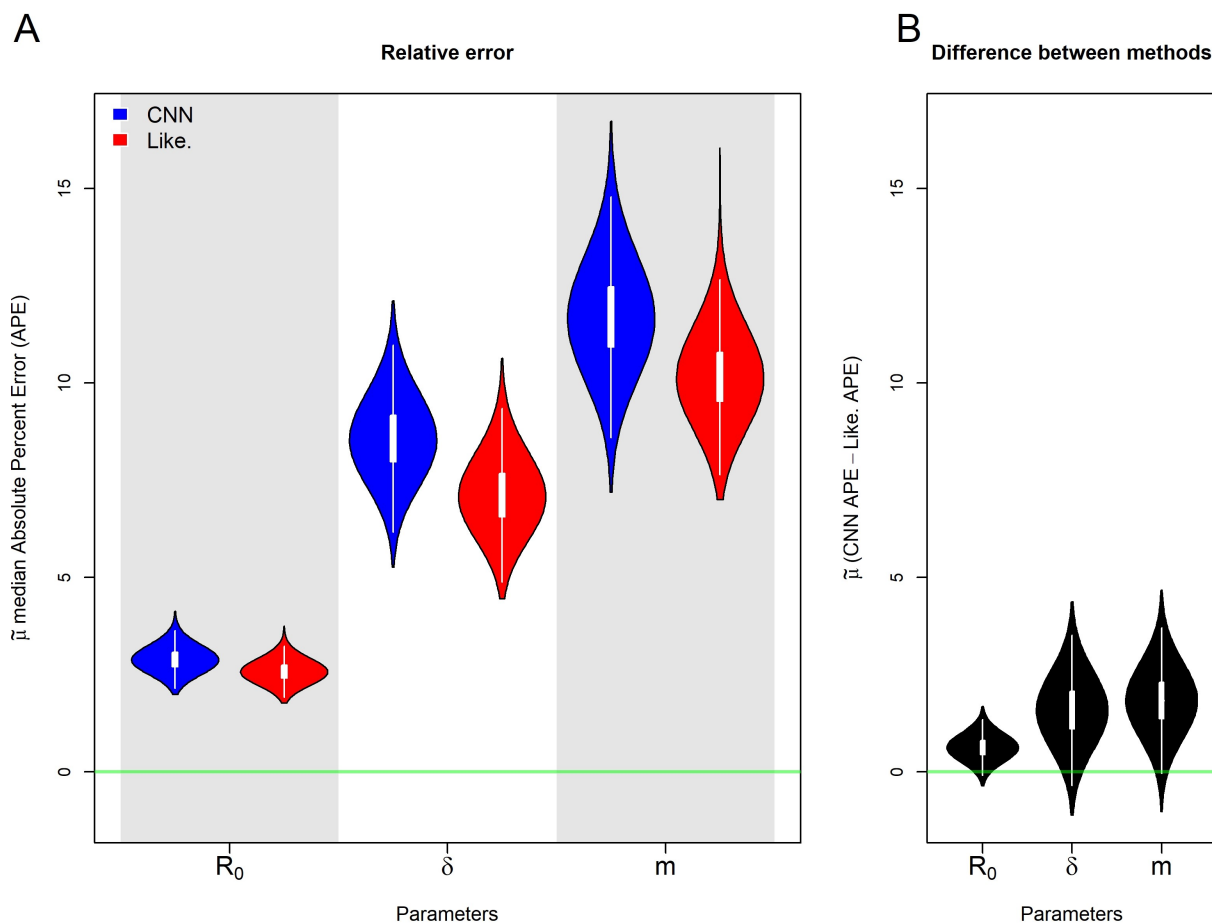

Figure S3: Posterior distributions of the population median,  $\tilde{\mu}$ , APE estimates of the rate parameters  $R_0$ ,  $\delta$ , and  $m$  under the true model. A) shows posterior distribution of the median APE for each of the 3 rate parameters estimated by the CNN (blue) and the likelihood-based method (red). The green line indicates no error. B) shows the posterior distribution for the median difference between the CNN estimate's APE and the likelihood-based estimate's APE. The green line indicates the median APE difference is zero.

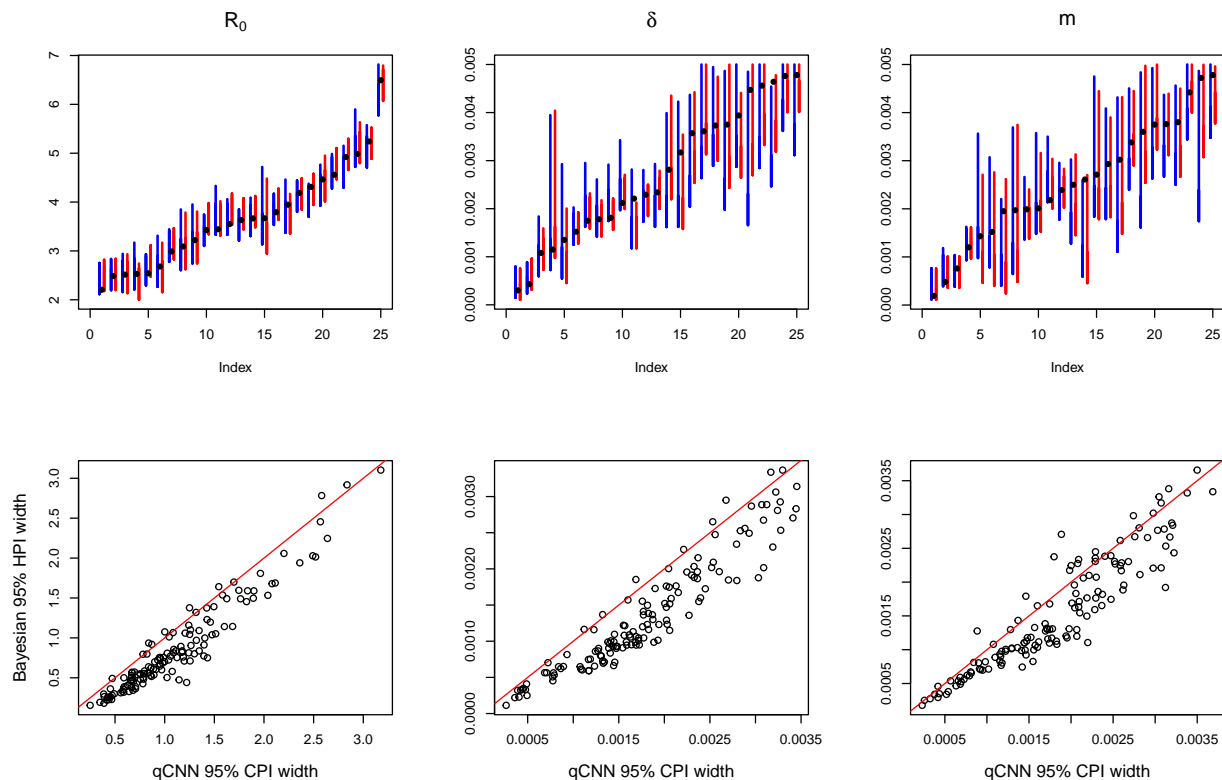

Figure S4: Comparison of interval overlap and relative widths of qCNN and Bayesian methods of uncertainty quantification under the true simulating model. Top row: 95% CPI from CNN conformalized quantile regression (blue). and 95% HPI from Bayesian phylogenetic analysis (red) from a random subset of the data for visualization purposes. Bottom row: scatterplots of the lengths of CPI and HPI intervals of all experiment data. The red diagonal  $y = x$  line is for reference.

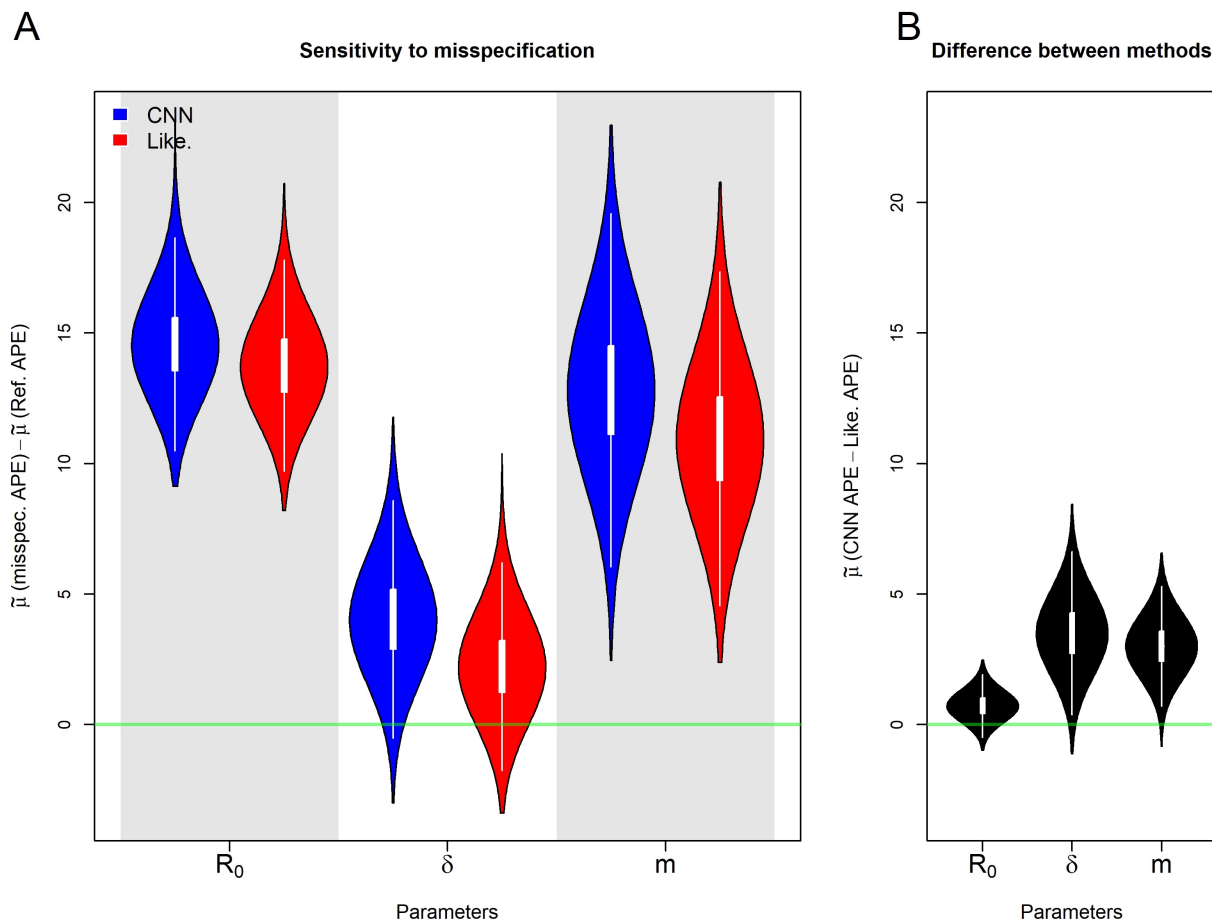

Figure S5: Posterior distributions of median,  $\tilde{\mu}$ , APE for the misspecified  $R_0$  experiment. A) shows posterior distribution of the difference between the median error under the misspecified model and the the median error under the true, reference model. B) shows the posterior distribution for the population median difference between the CNN estimate's APE and the likelihood-based estimate's APE.

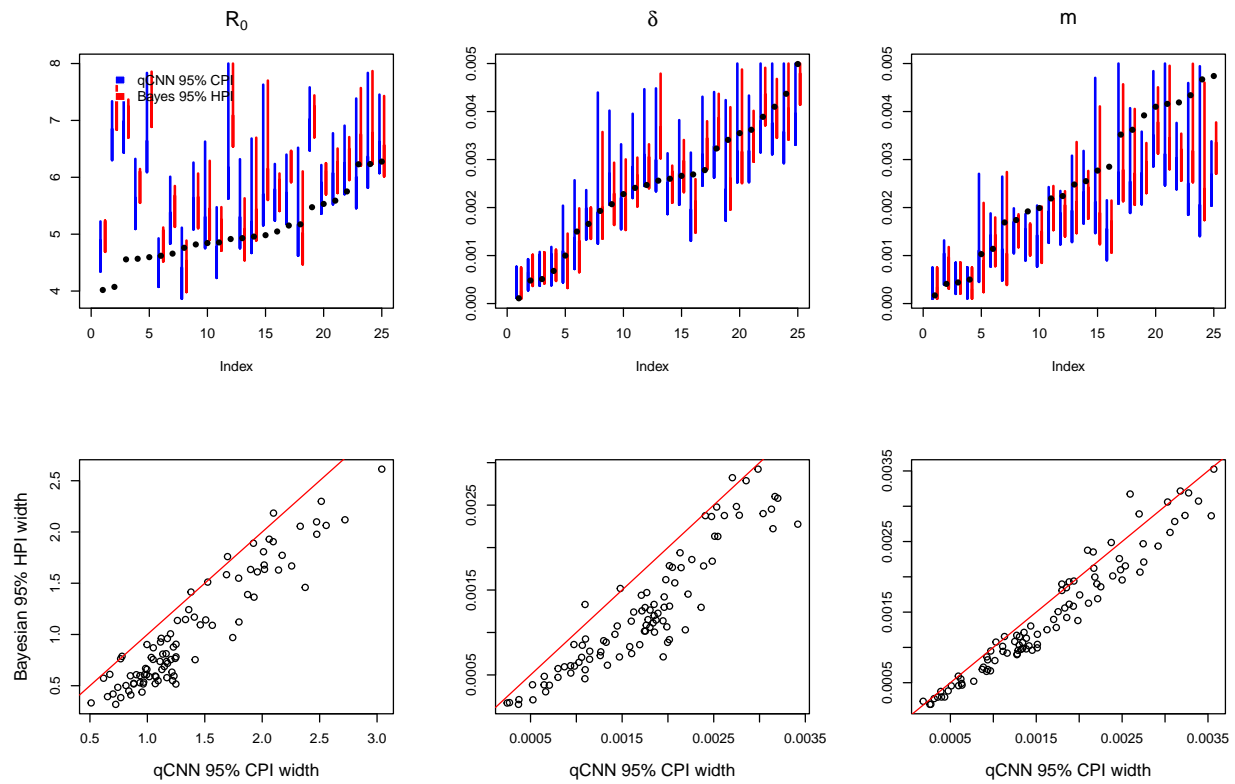

Figure S6: Comparison of CPI and HPI intervals for misspecified  $R_0$  experiment. See SI Figure S4 for general details about plot.

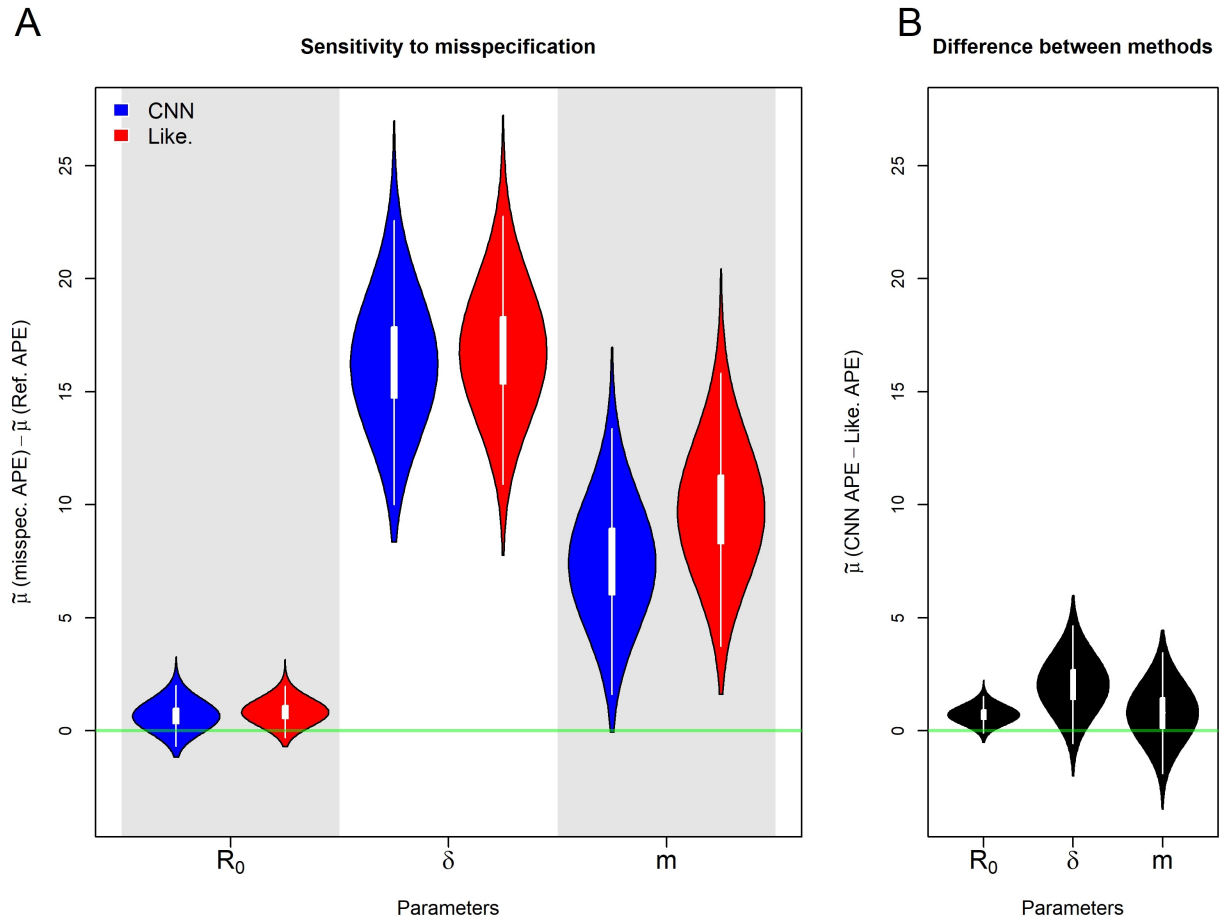

Figure S7: Posterior distributions of median,  $\tilde{\mu}$ , APE for the misspecified sampling rate,  $\delta$ , experiment. Details are the same as in S5



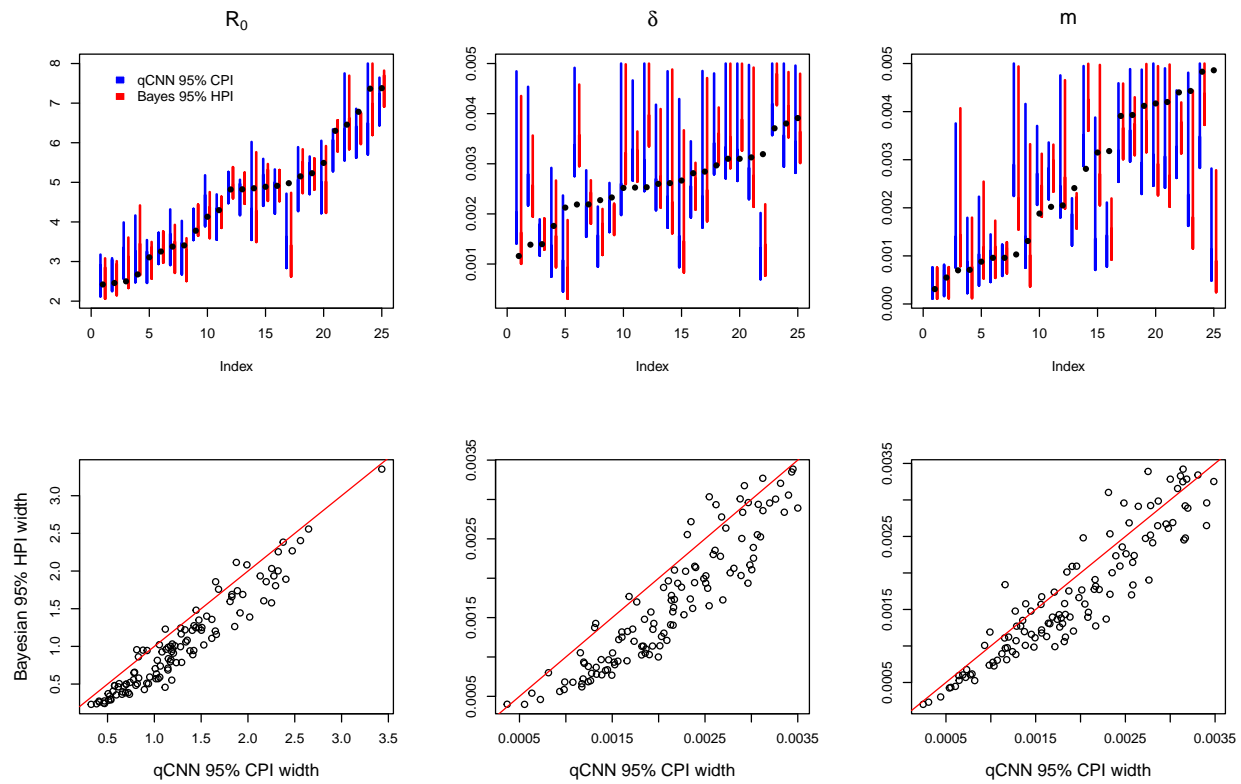

Figure S8: Comparison of CPI and HPI intervals for misspecified  $\delta$  experiment. See SI Figure S4 for general details about plot.

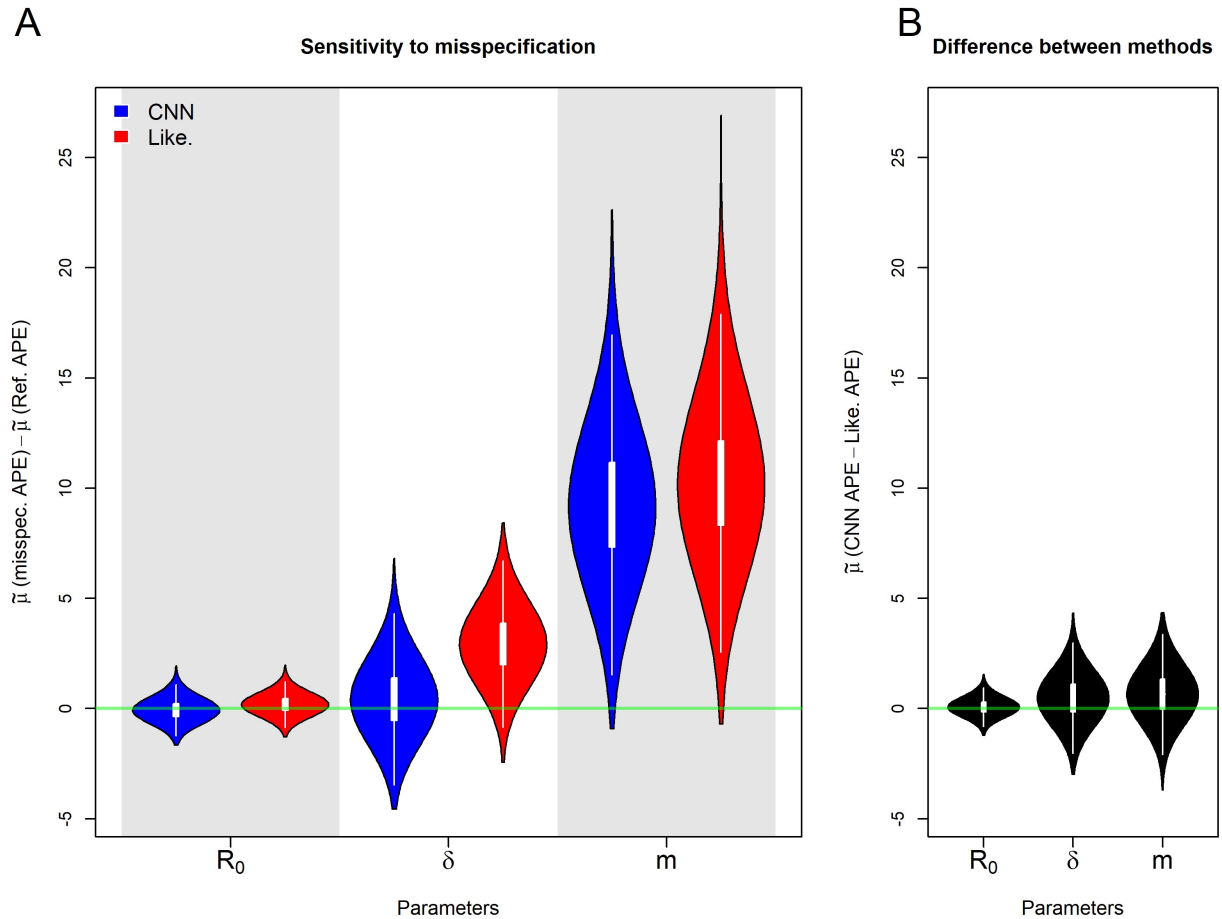

Figure S9: Posterior distributions of median,  $\tilde{\mu}$ , APE for the misspecified migration rate,  $m$ , experiment. Details are the same as in S5

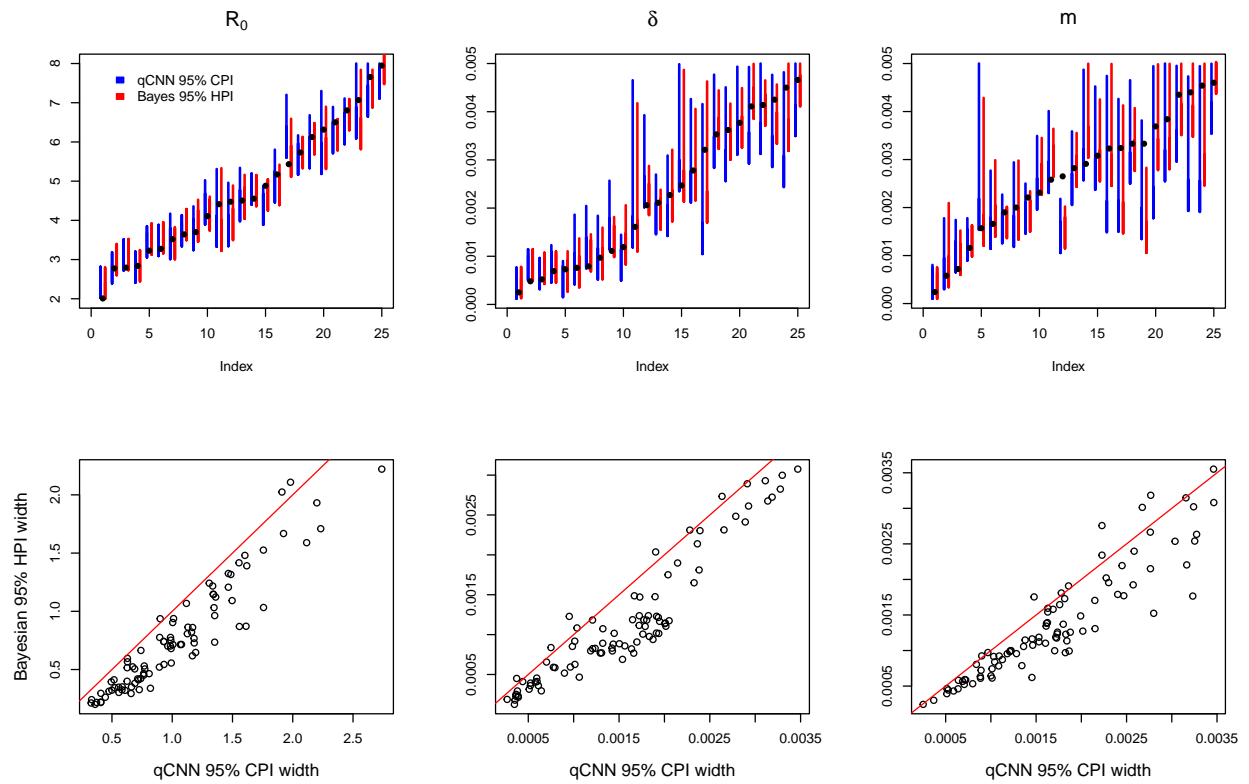

Figure S10: Comparison of CPI and HPI intervals for misspecified migration rate experiment. See SI Figure S4 for general details about plot.

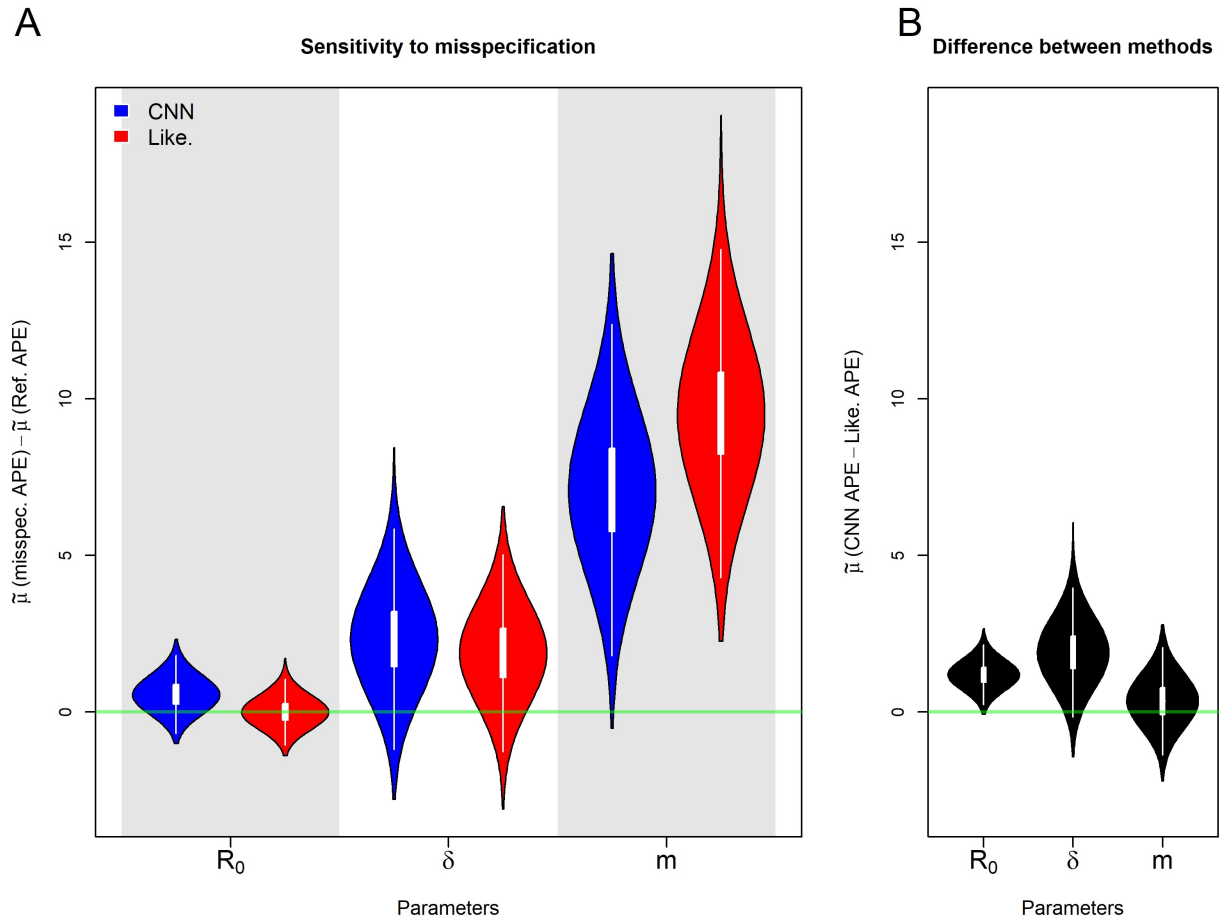

Figure S11: Posterior distributions of the median APE when the model is misspecified for the number of locations. Details are the same as in S5

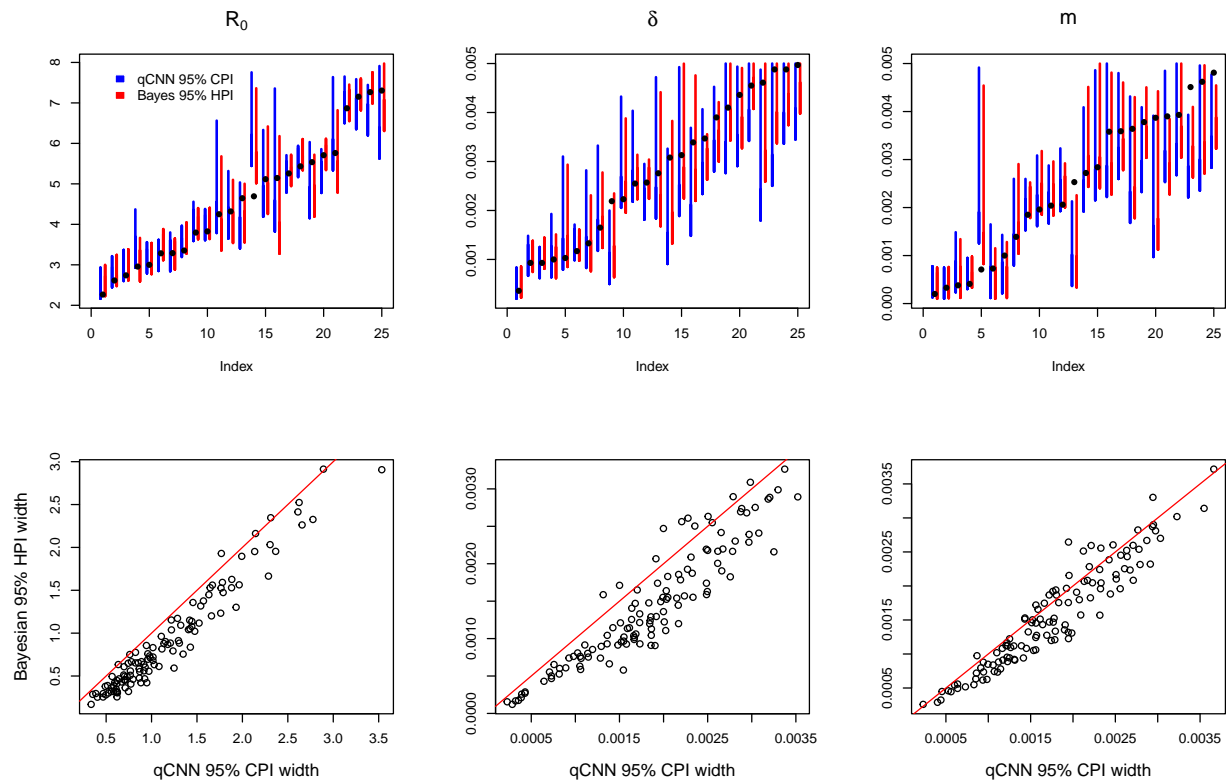

Figure S12: Comparison of CPI and HPI intervals for misspecified number of locations experiment. See SI Figure S4 for general details about plot.

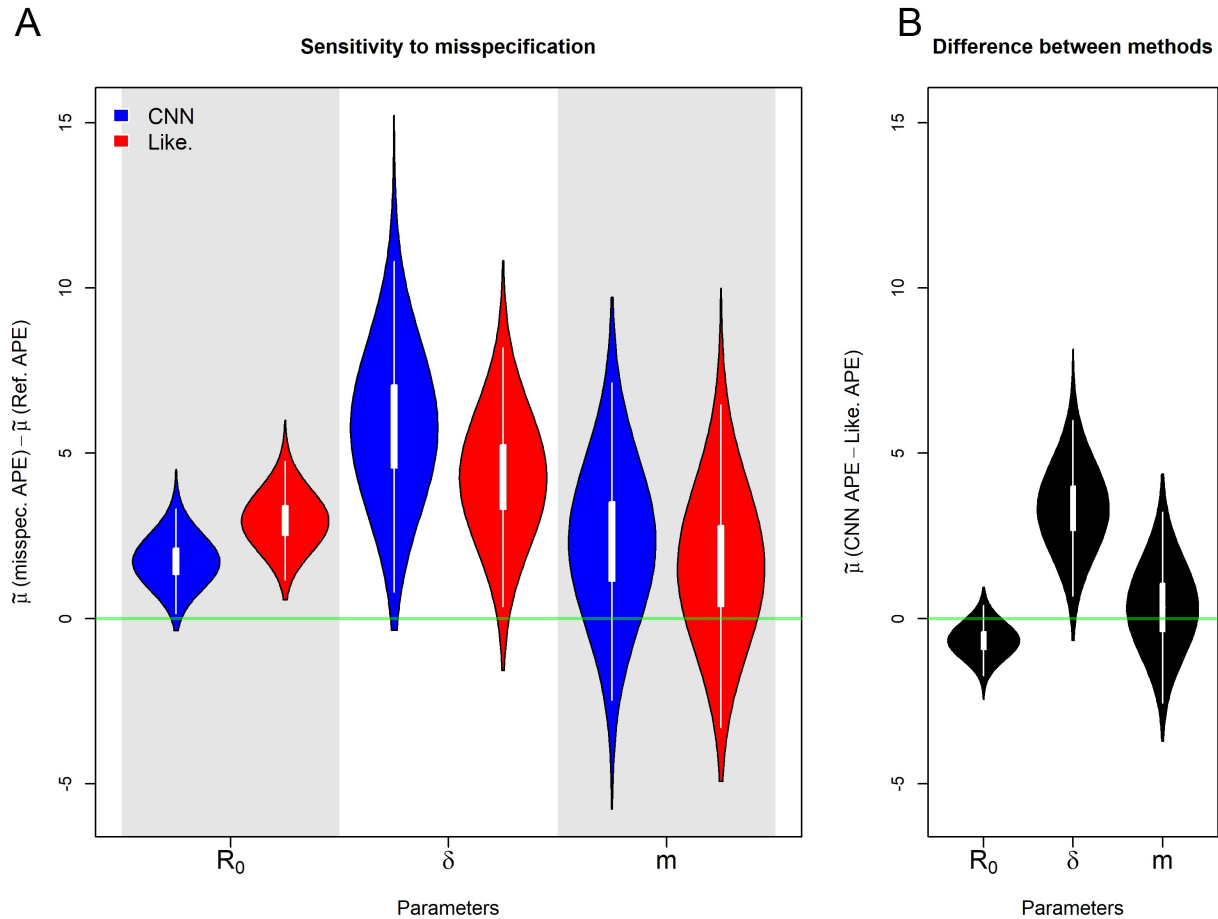

Figure S13: Posterior distributions of the median APE when the phylogenetic tree is incorrect. Details are the same as in S5

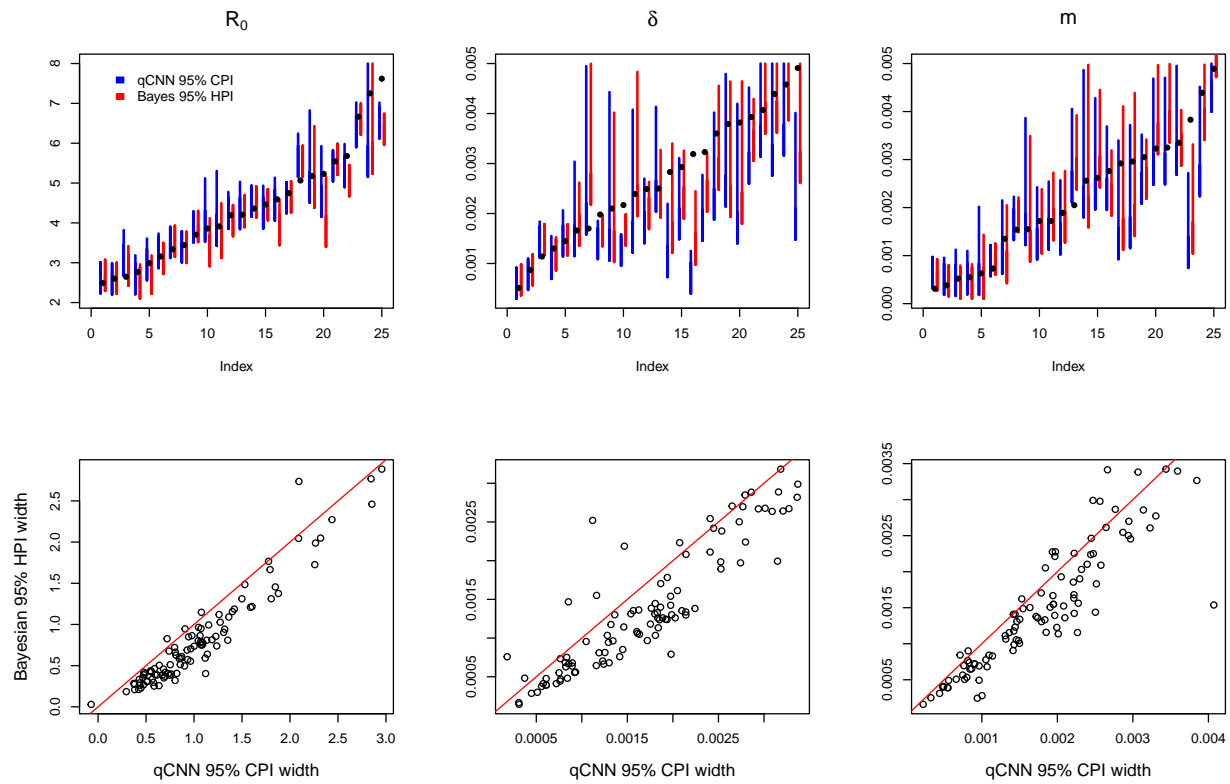

Figure S14: Comparison of CPI and HPI intervals for phylogeny error experiment. See SI Figure S4 for general details about plot.
